# Supplementary material for: Characterizing the Impact of Smoking and Lung Cancer on the Airway Transcriptome Using RNA-Seq
Source: Oxford University Press journal article supplement (doi:10.1158/1940-6207.capr-11-0212), 2011-06-01
Supplement: 19406207capr110212-sup-212_supp_table_6.pdf [file 19406207capr110212-sup-212_supp_table_6.pdf]

| Category                            | Ensembl ID      | NS RPKM (TS) | RPKM (Sc) | log2 FC Sv | NS FPKM (CS) | FPKM (Cu) | log2 FC Sv | Microarray | Microarray |
|-------------------------------------|-----------------|--------------|-----------|------------|--------------|-----------|------------|------------|------------|
| Interrogated by both, DE by RNA-seq | ENSG00000101314 | 119.0821     | 20.20541  | -2.55914   | 4.35599      | 0.152876  | -4.83257   | -0.50247   | 0.181255   |
| Interrogated by both, DE by RNA-seq | ENSG00000101314 | 64.1609      | 12.63441  | -2.34434   | 3.09449      | 0.581211  | -2.41257   | -0.28322   | 0.371268   |
| Interrogated by both, DE by RNA-seq | ENSG00000101314 | 79.5875      | 16.1257   | -2.30318   | 1.77299      | 0.398263  | -2.15439   | -0.14129   | 0.350322   |
| Interrogated by both, DE by RNA-seq | ENSG00000101314 | 36.56989     | 8.266748  | -2.14526   | 1.29679      | 0.192177  | -2.75444   | -0.32622   | 0.109118   |
| Interrogated by both, DE by RNA-seq | ENSG00000101314 | 79.95929     | 18.50916  | -2.11103   | 7.0131       | 1.23976   | -2.49999   | -0.44638   | 0.289648   |
| Interrogated by both, DE by RNA-seq | ENSG00000101314 | 106.2418     | 25.02589  | -2.08586   | 0.036873     | 0.001802  | -4.35527   | -0.12021   | 0.478576   |
| Interrogated by both, DE by RNA-seq | ENSG00000101314 | 32.58103     | 8.46237   | -1.9449    | 0.251807     | 0.000214  | -10.2037   | 0.051387   | 0.844879   |
| Interrogated by both, DE by RNA-seq | ENSG00000101314 | 115.8007     | 30.43104  | -1.92803   | 11.9753      | 3.41284   | -1.81102   | -0.27051   | 0.199904   |
| Interrogated by both, DE by RNA-seq | ENSG00000101314 | 98.69387     | 26.52866  | -1.89541   | 3.89983      | 0.994516  | -1.97134   | 0.234271   | 0.398656   |
| Interrogated by both, DE by RNA-seq | ENSG00000101314 | 2585.446     | 699.4331  | -1.88616   | 116.753      | 31.3333   | -1.89769   | -0.04281   | 0.872949   |
| Interrogated by both, DE by RNA-seq | ENSG00000101314 | 24.21538     | 7.348241  | -1.72045   | 3.16775      | 0.840808  | -1.91361   | 0.185969   | 0.493885   |
| Interrogated by both, DE by RNA-seq | ENSG00000101314 | 246.5364     | 79.04875  | -1.64099   | 1.68857      | 0.103441  | -4.02892   | 0.140237   | 0.490061   |
| Interrogated by both, DE by RNA-seq | ENSG00000101314 | 33.60841     | 10.82933  | -1.63388   | 1.53174      | 0.257579  | -2.57208   | -0.30578   | 0.083047   |
| Interrogated by both, DE by RNA-seq | ENSG00000101314 | 52.28146     | 17.12443  | -1.61024   | 3.13275      | 0.001187  | -11.3664   | -0.53815   | 0.083881   |
| Interrogated by both, DE by RNA-seq | ENSG00000101314 | 32.80572     | 11.46456  | -1.51677   | 0.066149     | 0.0004    | -7.36831   | 0.07805    | 0.620291   |
| Interrogated by both, DE by RNA-seq | ENSG00000101314 | 88.60534     | 31.25465  | -1.50332   | 2.95646      | 0.882202  | -1.74469   | 0.146802   | 0.388637   |
| Interrogated by both, DE by RNA-seq | ENSG00000101314 | 57.53488     | 20.71988  | -1.47342   | 2.92782      | 0.027926  | -6.71206   | -0.30274   | 0.068884   |
| Interrogated by both, DE by RNA-seq | ENSG00000101314 | 23.7646      | 8.688847  | -1.45158   | 1.95912      | 0.855753  | -1.19494   | -0.42655   | 0.350277   |
| Interrogated by both, DE by RNA-seq | ENSG00000101314 | 60.06065     | 22.44854  | -1.4198    | 0.615465     | 0.266345  | -1.20838   | -0.17976   | 0.335786   |
| Interrogated by both, DE by RNA-seq | ENSG00000101314 | 832.6832     | 311.4903  | -1.41858   | 40.8821      | 13.4841   | -1.60021   | -0.52669   | 0.062012   |
| Interrogated by both, DE by RNA-seq | ENSG00000101314 | 2190.673     | 821.406   | -1.41521   | 119.624      | 49.8377   | -1.2632    | -0.5089    | 0.402817   |
| Interrogated by both, DE by RNA-seq | ENSG00000101314 | 17.97836     | 7.049761  | -1.35061   | 0.969906     | 0.379363  | -1.35427   | 0.146954   | 0.260683   |
| Interrogated by both, DE by RNA-seq | ENSG00000101314 | 686.1572     | 270.0702  | -1.3452    | 15.2092      | 5.01005   | -1.60205   | 0.370104   | 0.09299    |
| Interrogated by both, DE by RNA-seq | ENSG00000101314 | 1620.281     | 646.2317  | -1.32612   | 28.605       | 9.72915   | -1.55588   | -0.20108   | 0.317286   |
| Interrogated by both, DE by RNA-seq | ENSG00000101314 | 25.45972     | 10.2657   | -1.31038   | 1.79241      | 0.433025  | -2.04938   | -0.01511   | 0.94403    |
| Interrogated by both, DE by RNA-seq | ENSG00000101314 | 56.59431     | 22.87914  | -1.30662   | 1.73478      | 0.534296  | -1.69904   | -0.13697   | 0.29199    |
| Interrogated by both, DE by RNA-seq | ENSG00000101314 | 898.9151     | 363.7513  | -1.30523   | 45.1755      | 18.4301   | -1.29348   | -0.50473   | 0.114655   |
| Interrogated by both, DE by RNA-seq | ENSG00000101314 | 144.3827     | 58.86089  | -1.29452   | 68.971       | 26.0135   | -1.40673   | -0.0996    | 0.448798   |
| Interrogated by both, DE by RNA-seq | ENSG00000101314 | 46.39667     | 18.9957   | -1.28835   | 1.92561      | 0.681043  | -1.4995    | -0.05607   | 0.792929   |
| Interrogated by both, DE by RNA-seq | ENSG00000101314 | 1579.408     | 648.6457  | -1.28388   | 63.2036      | 31.4874   | -1.00523   | -0.3841    | 0.292105   |
| Interrogated by both, DE by RNA-seq | ENSG00000101314 | 29.23559     | 12.01669  | -1.28269   | 1.96938      | 0.81325   | -1.27597   | -0.17719   | 0.328476   |
| Interrogated by both, DE by RNA-seq | ENSG00000101314 | 114823.6     | 47202.66  | -1.28248   | 4969.48      | 2433.2    | -1.03024   | -0.2831    | 0.138327   |
| Interrogated by both, DE by RNA-seq | ENSG00000101314 | 846.3842     | 357.4012  | -1.24377   | 56.7569      | 26.907    | -1.07681   | -0.06156   | 0.676237   |

|                                     |            |          |          |          |          |          |          |          |          |
|-------------------------------------|------------|----------|----------|----------|----------|----------|----------|----------|----------|
| Interrogated by both, DE by RNA-seq | ENSG000001 | 43.27286 | 18.3826  | -1.23512 | 1.70247  | 0.902834 | -0.9151  | 0.166225 | 0.336875 |
| Interrogated by both, DE by RNA-seq | ENSG000002 | 257.8051 | 111.5163 | -1.20903 | 1.35088  | 0.797289 | -0.76072 | -0.28361 | 0.183649 |
| Interrogated by both, DE by RNA-seq | ENSG000003 | 555.5345 | 240.6764 | -1.20678 | 49.4389  | 24.4275  | -1.01714 | -0.28426 | 0.128418 |
| Interrogated by both, DE by RNA-seq | ENSG000004 | 87.83187 | 38.69141 | -1.18273 | 0.625441 | 0.143412 | -2.12471 | 0.148323 | 0.443249 |
| Interrogated by both, DE by RNA-seq | ENSG000005 | 101.4332 | 44.7592  | -1.18027 | 6.68076  | 1.62087  | -2.04324 | -0.12342 | 0.453336 |
| Interrogated by both, DE by RNA-seq | ENSG000006 | 28.51063 | 12.60655 | -1.17733 | 8.26916  | 3.01272  | -1.45667 | 0.04915  | 0.85788  |
| Interrogated by both, DE by RNA-seq | ENSG000007 | 10.33664 | 4.644908 | -1.15405 | 2.29961  | 0.117505 | -4.2906  | -0.19158 | 0.238539 |
| Interrogated by both, DE by RNA-seq | ENSG000008 | 11.48149 | 5.184014 | -1.14717 | 29.5423  | 1.2185   | -4.5996  | -0.32189 | 0.058284 |
| Interrogated by both, DE by RNA-seq | ENSG000009 | 352.4475 | 160.9279 | -1.13099 | 15.2324  | 1.34061  | -3.50618 | 0.130492 | 0.437027 |
| Interrogated by both, DE by RNA-seq | ENSG000010 | 194.0507 | 90.32405 | -1.10325 | 95.3877  | 51.9981  | -0.87534 | -0.31818 | 0.139898 |
| Interrogated by both, DE by RNA-seq | ENSG000011 | 254.3364 | 119.1267 | -1.09424 | 27.7205  | 12.0946  | -1.19659 | -0.45258 | 0.32787  |
| Interrogated by both, DE by RNA-seq | ENSG000012 | 39.36285 | 18.51457 | -1.08817 | 3.00999  | 0.102332 | -4.87843 | -0.17049 | 0.488367 |
| Interrogated by both, DE by RNA-seq | ENSG000013 | 1099.467 | 517.3694 | -1.08754 | 35.2305  | 15.548   | -1.1801  | -0.26173 | 0.137736 |
| Interrogated by both, DE by RNA-seq | ENSG000014 | 622.713  | 294.3057 | -1.08125 | 47.0307  | 16.3953  | -1.52032 | -0.31965 | 0.167264 |
| Interrogated by both, DE by RNA-seq | ENSG000015 | 51.49424 | 24.48727 | -1.07238 | 12.5153  | 1.88105  | -2.73408 | -0.24265 | 0.15171  |
| Interrogated by both, DE by RNA-seq | ENSG000016 | 173.2279 | 84.60763 | -1.03381 | 11.5833  | 4.72417  | -1.29391 | 0.153393 | 0.372079 |
| Interrogated by both, DE by RNA-seq | ENSG000017 | 156.959  | 77.12721 | -1.02508 | 15.4419  | 5.74456  | -1.42658 | 0.369195 | 0.068168 |
| Interrogated by both, DE by RNA-seq | ENSG000018 | 851.7367 | 421.8552 | -1.01366 | 45.7559  | 19.9775  | -1.19558 | -0.09787 | 0.587012 |
| Interrogated by both, DE by RNA-seq | ENSG000019 | 284.4876 | 142.4415 | -0.998   | 7.12667  | 2.9349   | -1.27992 | -0.13563 | 0.513602 |
| Interrogated by both, DE by RNA-seq | ENSG000020 | 305.1112 | 153.5723 | -0.99042 | 9.45214  | 4.9055   | -0.94624 | 0.0382   | 0.79187  |
| Interrogated by both, DE by RNA-seq | ENSG000021 | 45.85325 | 23.28216 | -0.9778  | 26.272   | 1.46194  | -4.16757 | -0.10567 | 0.526299 |
| Interrogated by both, DE by RNA-seq | ENSG000022 | 483.2492 | 246.0344 | -0.97391 | 24.7002  | 7.84932  | -1.65388 | 0.130102 | 0.591242 |
| Interrogated by both, DE by RNA-seq | ENSG000023 | 24.74728 | 12.71951 | -0.96023 | 23.208   | 4.10424  | -2.49944 | -0.01868 | 0.89783  |
| Interrogated by both, DE by RNA-seq | ENSG000024 | 38.65933 | 20.09804 | -0.94376 | 26.8279  | 4.5826   | -2.5495  | 0.011042 | 0.936504 |
| Interrogated by both, DE by RNA-seq | ENSG000025 | 52.70925 | 27.4126  | -0.94322 | 0.598521 | 0.005736 | -6.70512 | 0.008064 | 0.96252  |
| Interrogated by both, DE by RNA-seq | ENSG000026 | 25.6028  | 13.32684 | -0.94197 | 0.39301  | 0.005016 | -6.29178 | -0.21875 | 0.322213 |
| Interrogated by both, DE by RNA-seq | ENSG000027 | 64.37798 | 33.54383 | -0.94052 | 2.35203  | 1.50318  | -0.64589 | 0.291356 | 0.235855 |
| Interrogated by both, DE by RNA-seq | ENSG000028 | 2965.957 | 1550.613 | -0.93566 | 84.796   | 41.1489  | -1.04314 | 0.053319 | 0.792849 |
| Interrogated by both, DE by RNA-seq | ENSG000029 | 163.5418 | 85.53972 | -0.93499 | 30.3484  | 12.7638  | -1.24956 | -0.16588 | 0.43292  |
| Interrogated by both, DE by RNA-seq | ENSG000030 | 220.9662 | 115.8536 | -0.93152 | 6.24946  | 2.1767   | -1.52159 | -0.09128 | 0.622934 |
| Interrogated by both, DE by RNA-seq | ENSG000031 | 240.0164 | 126.4197 | -0.92491 | 0.182066 | 9.91E-05 | -10.8433 | 0.053621 | 0.817954 |
| Interrogated by both, DE by RNA-seq | ENSG000032 | 141.0252 | 74.36659 | -0.92323 | 6.43023  | 0.712471 | -3.17397 | -0.1828  | 0.476047 |
| Interrogated by both, DE by RNA-seq | ENSG000033 | 1300.455 | 685.9511 | -0.92284 | 51.4668  | 23.9316  | -1.10473 | -0.33726 | 0.285657 |
| Interrogated by both, DE by RNA-seq | ENSG000034 | 3482.919 | 1845.061 | -0.91663 | 207.705  | 117.419  | -0.82287 | -0.35106 | 0.259969 |

|                                     |                   |          |          |          |          |          |          |          |
|-------------------------------------|-------------------|----------|----------|----------|----------|----------|----------|----------|
| Interrogated by both, DE by RNA-seq | ENSG000001119.185 | 601.913  | -0.89482 | 83.463   | 48.3035  | -0.78901 | -0.06587 | 0.61447  |
| Interrogated by both, DE by RNA-seq | ENSG0000023.02338 | 12.48733 | -0.88263 | 2.60332  | 8.90E-09 | -28.1239 | 0.325789 | 0.138148 |
| Interrogated by both, DE by RNA-seq | ENSG000001182.576 | 643.1171 | -0.87878 | 66.7309  | 34.0074  | -0.97251 | -0.30543 | 0.131629 |
| Interrogated by both, DE by RNA-seq | ENSG0000073.34972 | 40.06722 | -0.87237 | 16.7718  | 4.5845   | -1.8712  | -0.28437 | 0.081055 |
| Interrogated by both, DE by RNA-seq | ENSG00000229.5444 | 126.4776 | -0.85989 | 7.17553  | 1.26615  | -2.50264 | -0.17431 | 0.368594 |
| Interrogated by both, DE by RNA-seq | ENSG00000455.4816 | 253.9429 | -0.84289 | 53.7764  | 20.1866  | -1.41358 | -0.38546 | 0.075073 |
| Interrogated by both, DE by RNA-seq | ENSG00000142.245  | 79.46999 | -0.8399  | 2.37371  | 7.94E-10 | -31.4773 | -0.45375 | 0.098222 |
| Interrogated by both, DE by RNA-seq | ENSG00000333.316  | 187.7435 | -0.82813 | 40.2913  | 19.2766  | -1.06362 | -0.31585 | 0.107453 |
| Interrogated by both, DE by RNA-seq | ENSG00000131.9591 | 74.4524  | -0.8257  | 2.22341  | 0.016065 | -7.11269 | 0.258187 | 0.162234 |
| Interrogated by both, DE by RNA-seq | ENSG00000227.3362 | 128.5014 | -0.82304 | 25.9859  | 5.34943  | -2.28027 | -0.2889  | 0.150619 |
| Interrogated by both, DE by RNA-seq | ENSG00000120.559  | 68.41056 | -0.81745 | 67.1457  | 38.5546  | -0.80039 | -0.34936 | 0.179011 |
| Interrogated by both, DE by RNA-seq | ENSG00000171.1575 | 97.15319 | -0.81699 | 11.7004  | 5.7269   | -1.03073 | -0.19714 | 0.27893  |
| Interrogated by both, DE by RNA-seq | ENSG00000195.5513 | 111.1181 | -0.81545 | 10.1394  | 0.200271 | -5.66187 | -0.02408 | 0.874104 |
| Interrogated by both, DE by RNA-seq | ENSG000007960.431 | 4525.292 | -0.81484 | 134.708  | 67.1957  | -1.00339 | -0.0377  | 0.860982 |
| Interrogated by both, DE by RNA-seq | ENSG00000497.958  | 283.3424 | -0.81348 | 0.143336 | 0.034611 | -2.05011 | 0.168451 | 0.397842 |
| Interrogated by both, DE by RNA-seq | ENSG00000110.6792 | 63.08458 | -0.81103 | 5.23569  | 1.52783  | -1.7769  | -0.21908 | 0.308213 |
| Interrogated by both, DE by RNA-seq | ENSG000002786.508 | 1609.02  | -0.79228 | 93.3799  | 50.2046  | -0.89529 | -0.29135 | 0.1094   |
| Interrogated by both, DE by RNA-seq | ENSG0000032.69179 | 18.88948 | -0.79135 | 0.197542 | 0.001232 | -7.32451 | 0.007138 | 0.969065 |
| Interrogated by both, DE by RNA-seq | ENSG0000024.41653 | 14.12725 | -0.78938 | 2.01234  | 1.1069   | -0.86235 | -0.03388 | 0.900516 |
| Interrogated by both, DE by RNA-seq | ENSG0000019.20278 | 11.11672 | -0.78858 | 1.00148  | 0.018176 | -5.78396 | -0.11486 | 0.526606 |
| Interrogated by both, DE by RNA-seq | ENSG00000240.3217 | 139.2527 | -0.78726 | 19.2471  | 9.53216  | -1.01377 | -0.22024 | 0.288365 |
| Interrogated by both, DE by RNA-seq | ENSG00000112.007  | 64.91443 | -0.78698 | 2.16866  | 0.015245 | -7.15235 | 0.408691 | 0.301899 |
| Interrogated by both, DE by RNA-seq | ENSG00000203.6877 | 118.4962 | -0.78152 | 24.9134  | 1.67277  | -3.89661 | -0.44375 | 0.100139 |
| Interrogated by both, DE by RNA-seq | ENSG0000044.33847 | 26.10048 | -0.76448 | 23.2437  | 0.296654 | -6.29191 | -0.17857 | 0.273152 |
| Interrogated by both, DE by RNA-seq | ENSG00000101.4048 | 59.82009 | -0.76142 | 2.58853  | 0.097786 | -4.72636 | 0.098122 | 0.561149 |
| Interrogated by both, DE by RNA-seq | ENSG0000027041.92 | 16052.66 | -0.75239 | 679.047  | 377.325  | -0.8477  | 0.135669 | 0.342967 |
| Interrogated by both, DE by RNA-seq | ENSG000002730.15  | 1621.035 | -0.75206 | 190.811  | 103.855  | -0.87757 | -0.31841 | 0.07921  |
| Interrogated by both, DE by RNA-seq | ENSG000003173.21  | 1901.216 | -0.73902 | 164.938  | 93.6369  | -0.81677 | -0.06633 | 0.801441 |
| Interrogated by both, DE by RNA-seq | ENSG000001116.805 | 670.5961 | -0.73586 | 15.8406  | 0.643226 | -4.62216 | -0.22858 | 0.262555 |
| Interrogated by both, DE by RNA-seq | ENSG0000088.66165 | 53.37173 | -0.73223 | 5.52531  | 1.52376  | -1.85842 | -0.30615 | 0.098395 |
| Interrogated by both, DE by RNA-seq | ENSG00000565.6451 | 343.4633 | -0.71974 | 44.3285  | 20.2365  | -1.13127 | -0.37994 | 0.459148 |
| Interrogated by both, DE by RNA-seq | ENSG00000429.4933 | 261.4295 | -0.71621 | 25.8616  | 11.4326  | -1.17766 | 0.086262 | 0.575139 |
| Interrogated by both, DE by RNA-seq | ENSG0000092.12895 | 56.16636 | -0.71395 | 3.49314  | 0.561214 | -2.6379  | -0.04434 | 0.769193 |
| Interrogated by both, DE by RNA-seq | ENSG00000185.1115 | 113.8351 | -0.70145 | 2.02891  | 0.37172  | -2.44842 | 0.109728 | 0.540003 |

|                                     |            |          |          |          |          |          |          |          |          |
|-------------------------------------|------------|----------|----------|----------|----------|----------|----------|----------|----------|
| Interrogated by both, DE by RNA-seq | ENSG000001 | 307.0813 | 190.3349 | -0.69008 | 10.5025  | 2.11576  | -2.31148 | -0.17602 | 0.303831 |
| Interrogated by both, DE by RNA-seq | ENSG000002 | 21.89241 | 13.58852 | -0.68804 | 1.39196  | 0.35963  | -1.95253 | 0.030528 | 0.831176 |
| Interrogated by both, DE by RNA-seq | ENSG000003 | 151.6385 | 94.40132 | -0.68376 | 4.08636  | 0.915533 | -2.15813 | -0.04096 | 0.832391 |
| Interrogated by both, DE by RNA-seq | ENSG000004 | 40.1876  | 25.05075 | -0.6819  | 16.3818  | 2.63365  | -2.63696 | -0.47964 | 0.235176 |
| Interrogated by both, DE by RNA-seq | ENSG000005 | 6.730773 | 4.22072  | -0.67328 | 0.875323 | 0.061098 | -3.84063 | 0.004855 | 0.972544 |
| Interrogated by both, DE by RNA-seq | ENSG000006 | 59.90869 | 37.77    | -0.66552 | 0.422482 | 0.156375 | -1.43388 | -0.10973 | 0.570827 |
| Interrogated by both, DE by RNA-seq | ENSG000007 | 4550.404 | 2871.47  | -0.66421 | 326.395  | 207.266  | -0.65514 | -0.15547 | 0.286042 |
| Interrogated by both, DE by RNA-seq | ENSG000008 | 19.23418 | 12.14215 | -0.66365 | 3.75128  | 2.19951  | -0.7702  | 0.184994 | 0.27781  |
| Interrogated by both, DE by RNA-seq | ENSG000009 | 121.1855 | 76.80144 | -0.65801 | 10.4443  | 2.04409  | -2.35319 | -0.21409 | 0.216104 |
| Interrogated by both, DE by RNA-seq | ENSG000010 | 228.3883 | 145.0594 | -0.65484 | 78.2582  | 44.6176  | -0.81063 | -0.2063  | 0.38238  |
| Interrogated by both, DE by RNA-seq | ENSG000011 | 668.6571 | 426.7762 | -0.64779 | 71.8304  | 24.1372  | -1.57334 | -0.27619 | 0.168224 |
| Interrogated by both, DE by RNA-seq | ENSG000012 | 822.0659 | 526.087  | -0.64395 | 21.4672  | 13.0552  | -0.71751 | -0.09258 | 0.768872 |
| Interrogated by both, DE by RNA-seq | ENSG000013 | 506.0978 | 325.832  | -0.63529 | 46.3451  | 22.9045  | -1.01679 | 0.134661 | 0.703788 |
| Interrogated by both, DE by RNA-seq | ENSG000014 | 3245.765 | 2094.588 | -0.63189 | 99.8085  | 60.6163  | -0.71946 | -0.00445 | 0.981917 |
| Interrogated by both, DE by RNA-seq | ENSG000015 | 18301.36 | 11824.42 | -0.63018 | 920.582  | 523.079  | -0.81552 | -0.21154 | 0.19078  |
| Interrogated by both, DE by RNA-seq | ENSG000016 | 150.8546 | 97.54665 | -0.62899 | 10.0477  | 3.29869  | -1.6069  | -0.2835  | 0.065865 |
| Interrogated by both, DE by RNA-seq | ENSG000017 | 49.74047 | 32.20565 | -0.62711 | 5.49028  | 1.4196   | -1.9514  | -0.03513 | 0.876486 |
| Interrogated by both, DE by RNA-seq | ENSG000018 | 16.71703 | 10.87874 | -0.61981 | 0.756795 | 0.005806 | -7.02632 | -0.08358 | 0.696438 |
| Interrogated by both, DE by RNA-seq | ENSG000019 | 184.9813 | 121.0222 | -0.61211 | 41.4334  | 16.3899  | -1.33799 | -0.07518 | 0.720272 |
| Interrogated by both, DE by RNA-seq | ENSG000020 | 719.3364 | 471.6124 | -0.60907 | 89.8019  | 47.2454  | -0.92657 | -0.20907 | 0.248553 |
| Interrogated by both, DE by RNA-seq | ENSG000021 | 2306.337 | 1519.534 | -0.60197 | 134.33   | 87.8654  | -0.61241 | -0.18552 | 0.373891 |
| Interrogated by both, DE by RNA-seq | ENSG000022 | 432.3326 | 286.4937 | -0.59364 | 62.3458  | 29.1491  | -1.09684 | -0.252   | 0.117384 |
| Interrogated by both, DE by RNA-seq | ENSG000023 | 20.38484 | 13.50883 | -0.59359 | 1.14368  | 0.030014 | -5.25192 | -0.16645 | 0.253196 |
| Interrogated by both, DE by RNA-seq | ENSG000024 | 157.9787 | 104.7434 | -0.59287 | 18.8736  | 8.70123  | -1.11708 | -0.09121 | 0.495143 |
| Interrogated by both, DE by RNA-seq | ENSG000025 | 7.562415 | 5.024478 | -0.58987 | 0.731967 | 0.175341 | -2.06162 | -0.27862 | 0.171344 |
| Interrogated by both, DE by RNA-seq | ENSG000026 | 101.0629 | 152.3372 | 0.592015 | 7.27829  | 11.812   | 0.698582 | -0.08184 | 0.571522 |
| Interrogated by both, DE by RNA-seq | ENSG000027 | 2954.383 | 4475.72  | 0.599263 | 267.158  | 433.622  | 0.698745 | 0.058332 | 0.73424  |
| Interrogated by both, DE by RNA-seq | ENSG000028 | 536.1363 | 813.1991 | 0.601009 | 32.5948  | 52.0359  | 0.674865 | -0.12216 | 0.512148 |
| Interrogated by both, DE by RNA-seq | ENSG000029 | 246.4692 | 374.8274 | 0.604819 | 39.7338  | 118.163  | 1.57234  | 0.091737 | 0.565491 |
| Interrogated by both, DE by RNA-seq | ENSG000030 | 74.51243 | 113.5167 | 0.607351 | 9.71895  | 85.6069  | 3.138855 | -0.06513 | 0.641161 |
| Interrogated by both, DE by RNA-seq | ENSG000031 | 717.0087 | 1094.341 | 0.61     | 34.3759  | 57.0479  | 0.730776 | 0.302653 | 0.057168 |
| Interrogated by both, DE by RNA-seq | ENSG000032 | 8998.254 | 13800.12 | 0.616964 | 247.034  | 387.078  | 0.647915 | 0.165942 | 0.252372 |
| Interrogated by both, DE by RNA-seq | ENSG000033 | 1945.889 | 2987.191 | 0.61836  | 147.843  | 225.468  | 0.608857 | 0.209086 | 0.254435 |
| Interrogated by both, DE by RNA-seq | ENSG000034 | 3691.844 | 5685.335 | 0.622904 | 225.268  | 383.367  | 0.767084 | 0.170426 | 0.239954 |

|                                     |                    |          |          |          |         |          |          |          |
|-------------------------------------|--------------------|----------|----------|----------|---------|----------|----------|----------|
| Interrogated by both, DE by RNA-seq | ENSG000001004.902  | 1550.22  | 0.625419 | 64.9792  | 108.42  | 0.738581 | 0.287499 | 0.065018 |
| Interrogated by both, DE by RNA-seq | ENSG0000019594.74  | 30243.66 | 0.626167 | 2081.89  | 3590.37 | 0.786239 | 0.182075 | 0.32993  |
| Interrogated by both, DE by RNA-seq | ENSG00000156.34855 | 87.75129 | 0.639042 | 11.7632  | 24.7917 | 1.075577 | 0.104038 | 0.490287 |
| Interrogated by both, DE by RNA-seq | ENSG0000015798.027 | 9035.108 | 0.63998  | 1061.26  | 1596.32 | 0.588972 | -0.08061 | 0.559075 |
| Interrogated by both, DE by RNA-seq | ENSG00000166.3942  | 259.5669 | 0.641501 | 59.8593  | 105.325 | 0.815201 | -0.12763 | 0.430894 |
| Interrogated by both, DE by RNA-seq | ENSG000001345.0406 | 539.1367 | 0.643885 | 49.6711  | 78.0307 | 0.651635 | 0.013512 | 0.925716 |
| Interrogated by both, DE by RNA-seq | ENSG0000013543.382 | 5563.51  | 0.650868 | 434.342  | 732.413 | 0.753826 | 0.270094 | 0.140886 |
| Interrogated by both, DE by RNA-seq | ENSG00000137.30053 | 58.57574 | 0.651107 | 1.65618  | 11.7715 | 2.829367 | -0.00294 | 0.982308 |
| Interrogated by both, DE by RNA-seq | ENSG000001401.0673 | 632.6308 | 0.657519 | 31.3819  | 58.2489 | 0.892298 | 0.218898 | 0.135893 |
| Interrogated by both, DE by RNA-seq | ENSG000001517.365  | 2401.358 | 0.662282 | 87.9727  | 136.101 | 0.62955  | 0.18005  | 0.522064 |
| Interrogated by both, DE by RNA-seq | ENSG00000181.43456 | 129.1843 | 0.665718 | 16.651   | 33.3015 | 0.999978 | 0.111108 | 0.502361 |
| Interrogated by both, DE by RNA-seq | ENSG000001106.0554 | 168.7088 | 0.669717 | 7.41494  | 12.1073 | 0.70737  | 0.108669 | 0.466974 |
| Interrogated by both, DE by RNA-seq | ENSG000001864.13   | 2969.256 | 0.671599 | 88.1281  | 138.964 | 0.657037 | 0.214713 | 0.322531 |
| Interrogated by both, DE by RNA-seq | ENSG000001196.2461 | 312.6162 | 0.671729 | 1.11083  | 4.82846 | 2.119925 | -0.0935  | 0.779603 |
| Interrogated by both, DE by RNA-seq | ENSG000001639.8588 | 1022.049 | 0.675639 | 149.09   | 232.626 | 0.641829 | 0.119044 | 0.394943 |
| Interrogated by both, DE by RNA-seq | ENSG000001206.5903 | 330.7063 | 0.678778 | 75.2562  | 118.241 | 0.651848 | 0.086449 | 0.636914 |
| Interrogated by both, DE by RNA-seq | ENSG000001178.5668 | 286.1111 | 0.680112 | 107.346  | 172.217 | 0.681959 | 0.100213 | 0.557034 |
| Interrogated by both, DE by RNA-seq | ENSG00000164459.78 | 103346.6 | 0.68102  | 5089.98  | 10382.3 | 1.028394 | 0.21216  | 0.200756 |
| Interrogated by both, DE by RNA-seq | ENSG000001292.7894 | 474.3093 | 0.695965 | 81.2982  | 124.084 | 0.610022 | 0.144432 | 0.315143 |
| Interrogated by both, DE by RNA-seq | ENSG000001638.6668 | 1037.712 | 0.700271 | 25.7319  | 45.3066 | 0.816163 | -0.0111  | 0.93935  |
| Interrogated by both, DE by RNA-seq | ENSG000001105.3288 | 171.9417 | 0.707019 | 21.2983  | 49.5314 | 1.217605 | 0.214403 | 0.203455 |
| Interrogated by both, DE by RNA-seq | ENSG000001473.6921 | 774.5531 | 0.709415 | 32.1372  | 51.7893 | 0.68841  | 0.033112 | 0.837678 |
| Interrogated by both, DE by RNA-seq | ENSG00000162.70789 | 102.7048 | 0.711785 | 7.63108  | 33.6747 | 2.141706 | 0.011634 | 0.955246 |
| Interrogated by both, DE by RNA-seq | ENSG00000183.47952 | 136.909  | 0.713723 | 5.37887  | 9.12463 | 0.762463 | 0.283352 | 0.114993 |
| Interrogated by both, DE by RNA-seq | ENSG00000131.80628 | 52.18166 | 0.714231 | 5.17084  | 10.1631 | 0.97487  | -0.07429 | 0.593844 |
| Interrogated by both, DE by RNA-seq | ENSG000001232.1019 | 380.8273 | 0.714378 | 28.7381  | 48.56   | 0.756804 | 0.043133 | 0.838326 |
| Interrogated by both, DE by RNA-seq | ENSG0000013899.22  | 6410.524 | 0.717257 | 470.118  | 753.492 | 0.680569 | 0.121606 | 0.464681 |
| Interrogated by both, DE by RNA-seq | ENSG00000115.75699 | 26.01012 | 0.723081 | 0.525539 | 1.57029 | 1.579161 | -0.088   | 0.669467 |
| Interrogated by both, DE by RNA-seq | ENSG0000015115.848 | 8445.118 | 0.723144 | 182.004  | 276.391 | 0.60274  | 0.030692 | 0.883973 |
| Interrogated by both, DE by RNA-seq | ENSG000001794.8379 | 1317.147 | 0.728684 | 47.2257  | 85.2721 | 0.852502 | 0.183514 | 0.247593 |
| Interrogated by both, DE by RNA-seq | ENSG000001676.1063 | 1121.129 | 0.72963  | 113.44   | 171.441 | 0.595783 | 0.205205 | 0.186634 |
| Interrogated by both, DE by RNA-seq | ENSG000001972.2316 | 1612.813 | 0.730208 | 60.8786  | 108.165 | 0.829227 | 0.30338  | 0.053441 |
| Interrogated by both, DE by RNA-seq | ENSG000001538.4432 | 893.6539 | 0.730922 | 26.746   | 101.234 | 1.920299 | -0.00447 | 0.983579 |
| Interrogated by both, DE by RNA-seq | ENSG0000016825.063 | 11352.53 | 0.7341   | 1541.57  | 2590.15 | 0.748635 | 0.213802 | 0.163637 |

|                                     |            |          |          |          |          |          |          |          |          |
|-------------------------------------|------------|----------|----------|----------|----------|----------|----------|----------|----------|
| Interrogated by both, DE by RNA-seq | ENSG000001 | 680.1402 | 1139.927 | 0.745038 | 47.3759  | 85.6637  | 0.854531 | 0.34684  | 0.077456 |
| Interrogated by both, DE by RNA-seq | ENSG000002 | 31.27958 | 52.48317 | 0.746634 | 1.14855  | 2.75293  | 1.261154 | -0.22083 | 0.177507 |
| Interrogated by both, DE by RNA-seq | ENSG000003 | 309.6493 | 520.1889 | 0.748401 | 49.2612  | 85.5342  | 0.79605  | 0.224554 | 0.206145 |
| Interrogated by both, DE by RNA-seq | ENSG000004 | 56.68793 | 95.34693 | 0.750145 | 2.51043  | 4.17599  | 0.734184 | 0.08744  | 0.676775 |
| Interrogated by both, DE by RNA-seq | ENSG000005 | 2238.963 | 3771.583 | 0.752339 | 118.886  | 182.236  | 0.616229 | 0.178118 | 0.194099 |
| Interrogated by both, DE by RNA-seq | ENSG000006 | 787.1842 | 1328.882 | 0.755439 | 84.2054  | 126.949  | 0.592264 | -0.11579 | 0.522855 |
| Interrogated by both, DE by RNA-seq | ENSG000007 | 165.8863 | 280.0868 | 0.755679 | 65.9284  | 129.915  | 0.978596 | 0.273219 | 0.103306 |
| Interrogated by both, DE by RNA-seq | ENSG000008 | 3451.239 | 5837.36  | 0.758202 | 265.814  | 449.418  | 0.757641 | 0.48045  | 0.068369 |
| Interrogated by both, DE by RNA-seq | ENSG000009 | 231.6298 | 392.0814 | 0.759332 | 31.9031  | 57.5143  | 0.850224 | 0.076851 | 0.69389  |
| Interrogated by both, DE by RNA-seq | ENSG000010 | 97.90829 | 165.7812 | 0.759778 | 32.2523  | 67.8037  | 1.071962 | 0.173262 | 0.218367 |
| Interrogated by both, DE by RNA-seq | ENSG000011 | 70.70328 | 120.0701 | 0.764028 | 0.512735 | 0.867112 | 0.758005 | -0.13215 | 0.584669 |
| Interrogated by both, DE by RNA-seq | ENSG000012 | 70.25466 | 119.6982 | 0.768736 | 1.34141  | 3.02572  | 1.173528 | 0.233083 | 0.172221 |
| Interrogated by both, DE by RNA-seq | ENSG000013 | 166.6231 | 283.9437 | 0.769017 | 49.6789  | 81.653   | 0.716873 | 0.134062 | 0.391017 |
| Interrogated by both, DE by RNA-seq | ENSG000014 | 234.3718 | 400.5518 | 0.77319  | 7.0953   | 13.6416  | 0.943077 | 0.096222 | 0.664765 |
| Interrogated by both, DE by RNA-seq | ENSG000015 | 197.7138 | 339.0438 | 0.778058 | 8.5468   | 16.7106  | 0.967307 | -0.02489 | 0.898584 |
| Interrogated by both, DE by RNA-seq | ENSG000016 | 40.87308 | 70.45298 | 0.78551  | 0.60792  | 8.89891  | 3.871675 | 0.326622 | 0.069723 |
| Interrogated by both, DE by RNA-seq | ENSG000017 | 2161.931 | 3728.806 | 0.786393 | 255.539  | 427.32   | 0.741773 | -0.00102 | 0.994885 |
| Interrogated by both, DE by RNA-seq | ENSG000018 | 233.1393 | 402.2138 | 0.78677  | 70.1048  | 109.047  | 0.637365 | 0.017421 | 0.918978 |
| Interrogated by both, DE by RNA-seq | ENSG000019 | 216.7162 | 375.2997 | 0.792236 | 16.1812  | 24.5631  | 0.602174 | 0.076886 | 0.727242 |
| Interrogated by both, DE by RNA-seq | ENSG000020 | 136.075  | 235.8071 | 0.793205 | 39.5723  | 84.7578  | 1.098855 | -0.18837 | 0.17939  |
| Interrogated by both, DE by RNA-seq | ENSG000021 | 1093.129 | 1894.656 | 0.793473 | 86.0928  | 129.605  | 0.590157 | 0.136955 | 0.312912 |
| Interrogated by both, DE by RNA-seq | ENSG000022 | 136.5978 | 237.0792 | 0.795435 | 20.7903  | 63.7796  | 1.617184 | 0.137826 | 0.332184 |
| Interrogated by both, DE by RNA-seq | ENSG000023 | 1283.889 | 2229.584 | 0.796254 | 55.4664  | 86.9292  | 0.648227 | 0.074365 | 0.606867 |
| Interrogated by both, DE by RNA-seq | ENSG000024 | 288.8873 | 503.0676 | 0.800245 | 13.9156  | 21.1811  | 0.606074 | -0.01926 | 0.88454  |
| Interrogated by both, DE by RNA-seq | ENSG000025 | 29.27974 | 51.1559  | 0.804998 | 1.33587  | 7.10994  | 2.412058 | 0.161844 | 0.323304 |
| Interrogated by both, DE by RNA-seq | ENSG000026 | 288.9981 | 504.9432 | 0.805061 | 28.0115  | 46.0351  | 0.716715 | -0.21834 | 0.20633  |
| Interrogated by both, DE by RNA-seq | ENSG000027 | 177.324  | 310.2202 | 0.806905 | 140.447  | 235.524  | 0.745848 | 0.06992  | 0.654427 |
| Interrogated by both, DE by RNA-seq | ENSG000028 | 57.59764 | 100.7896 | 0.807265 | 5.04838  | 8.54857  | 0.759863 | 0.03978  | 0.807187 |
| Interrogated by both, DE by RNA-seq | ENSG000029 | 53.57103 | 93.77699 | 0.807781 | 0.719068 | 1.57121  | 1.127676 | 0.002808 | 0.986498 |
| Interrogated by both, DE by RNA-seq | ENSG000030 | 402.0386 | 705.8705 | 0.81207  | 35.7422  | 64.0178  | 0.840845 | 0.116514 | 0.502989 |
| Interrogated by both, DE by RNA-seq | ENSG000031 | 159.6222 | 280.3623 | 0.812631 | 4.78873  | 9.3014   | 0.957805 | 0.126133 | 0.392292 |
| Interrogated by both, DE by RNA-seq | ENSG000032 | 575.2388 | 1011.066 | 0.813644 | 54.7703  | 84.5207  | 0.625911 | 0.059137 | 0.785446 |
| Interrogated by both, DE by RNA-seq | ENSG000033 | 144.4495 | 254.1065 | 0.814868 | 66.38    | 152.039  | 1.195621 | 0.366098 | 0.266538 |
| Interrogated by both, DE by RNA-seq | ENSG000034 | 176.8799 | 312.1156 | 0.819311 | 64.6625  | 113.265  | 0.808701 | 0.075081 | 0.68569  |

|                                     |            |          |          |          |          |         |          |          |          |
|-------------------------------------|------------|----------|----------|----------|----------|---------|----------|----------|----------|
| Interrogated by both, DE by RNA-seq | ENSG000001 | 124.7029 | 220.6278 | 0.82312  | 4.02556  | 11.1055 | 1.464013 | 0.145306 | 0.46864  |
| Interrogated by both, DE by RNA-seq | ENSG000002 | 622.6598 | 1102.44  | 0.824185 | 108.254  | 188.493 | 0.800091 | -0.19964 | 0.350964 |
| Interrogated by both, DE by RNA-seq | ENSG000003 | 283.5127 | 502.4256 | 0.825497 | 53.4283  | 99.3183 | 0.894455 | 0.017706 | 0.91507  |
| Interrogated by both, DE by RNA-seq | ENSG000004 | 526.7614 | 936.7588 | 0.830528 | 91.3943  | 149.729 | 0.712178 | 0.252315 | 0.214343 |
| Interrogated by both, DE by RNA-seq | ENSG000005 | 956.168  | 1701.595 | 0.831552 | 84.5551  | 135.349 | 0.678721 | 0.024677 | 0.888312 |
| Interrogated by both, DE by RNA-seq | ENSG000006 | 1621.259 | 2892.396 | 0.83515  | 120.271  | 210.927 | 0.810455 | 0.370203 | 0.366795 |
| Interrogated by both, DE by RNA-seq | ENSG000007 | 149.055  | 266.1865 | 0.836593 | 0.284308 | 1.90153 | 2.741634 | 0.301225 | 0.173216 |
| Interrogated by both, DE by RNA-seq | ENSG000008 | 545.4499 | 975.2326 | 0.8383   | 1.95523  | 3.11391 | 0.671389 | 0.144359 | 0.691611 |
| Interrogated by both, DE by RNA-seq | ENSG000009 | 607.5286 | 1088.371 | 0.841146 | 31.9916  | 101.175 | 1.661088 | 0.222359 | 0.157001 |
| Interrogated by both, DE by RNA-seq | ENSG000010 | 464.8936 | 834.3975 | 0.843834 | 40.5377  | 74.4964 | 0.877906 | 0.086534 | 0.59149  |
| Interrogated by both, DE by RNA-seq | ENSG000011 | 863.2733 | 1549.85  | 0.844239 | 58.1866  | 112.689 | 0.953588 | 0.167473 | 0.39732  |
| Interrogated by both, DE by RNA-seq | ENSG000012 | 160.7297 | 289.348  | 0.84817  | 93.7768  | 200.144 | 1.093735 | -0.05585 | 0.661028 |
| Interrogated by both, DE by RNA-seq | ENSG000013 | 46.21318 | 83.59785 | 0.855162 | 2.35529  | 24.8247 | 3.3978   | -0.19717 | 0.429957 |
| Interrogated by both, DE by RNA-seq | ENSG000014 | 37.47746 | 67.87219 | 0.856798 | 12.0231  | 49.5264 | 2.042389 | -0.17257 | 0.235371 |
| Interrogated by both, DE by RNA-seq | ENSG000015 | 3075.216 | 5581.665 | 0.860008 | 93.054   | 146.854 | 0.658242 | 0.416707 | 0.074666 |
| Interrogated by both, DE by RNA-seq | ENSG000016 | 2307.019 | 4194.922 | 0.862614 | 127.985  | 221.96  | 0.794325 | 0.251264 | 0.173431 |
| Interrogated by both, DE by RNA-seq | ENSG000017 | 1361.31  | 2480.514 | 0.865643 | 87.0617  | 154.286 | 0.825497 | 0.210138 | 0.395735 |
| Interrogated by both, DE by RNA-seq | ENSG000018 | 1577.109 | 2878.895 | 0.868233 | 94.6288  | 180.798 | 0.934027 | 0.224233 | 0.295857 |
| Interrogated by both, DE by RNA-seq | ENSG000019 | 64.87007 | 118.6267 | 0.870804 | 37.6941  | 94.1436 | 1.320524 | 0.169105 | 0.296708 |
| Interrogated by both, DE by RNA-seq | ENSG000020 | 602.4131 | 1104.287 | 0.87429  | 52.8515  | 88.6493 | 0.746165 | 0.077274 | 0.606372 |
| Interrogated by both, DE by RNA-seq | ENSG000021 | 28.71773 | 52.71802 | 0.876354 | 0.994707 | 2.83906 | 1.51307  | -0.15123 | 0.51346  |
| Interrogated by both, DE by RNA-seq | ENSG000022 | 635.36   | 1167.021 | 0.877185 | 136.839  | 242.812 | 0.82736  | 0.242852 | 0.186877 |
| Interrogated by both, DE by RNA-seq | ENSG000023 | 1047.504 | 1930.38  | 0.881928 | 72.5006  | 111.76  | 0.624339 | 0.057941 | 0.64973  |
| Interrogated by both, DE by RNA-seq | ENSG000024 | 440.9735 | 812.9278 | 0.882435 | 20.3076  | 40.3361 | 0.990052 | 0.25943  | 0.125416 |
| Interrogated by both, DE by RNA-seq | ENSG000025 | 42.50315 | 78.81737 | 0.890944 | 12.2069  | 36.4967 | 1.580069 | 0.098182 | 0.521484 |
| Interrogated by both, DE by RNA-seq | ENSG000026 | 3072.352 | 5704.632 | 0.892791 | 404.595  | 710.918 | 0.813205 | 0.333518 | 0.059838 |
| Interrogated by both, DE by RNA-seq | ENSG000027 | 255.1261 | 478.9116 | 0.908549 | 15.2535  | 32.8811 | 1.108118 | 0.022864 | 0.902051 |
| Interrogated by both, DE by RNA-seq | ENSG000028 | 178.867  | 337.0611 | 0.914123 | 38.8785  | 94.8868 | 1.287235 | 0.332516 | 0.137314 |
| Interrogated by both, DE by RNA-seq | ENSG000029 | 955.5331 | 1804.895 | 0.917537 | 194.448  | 313.151 | 0.687474 | 0.160435 | 0.325074 |
| Interrogated by both, DE by RNA-seq | ENSG000030 | 2905.905 | 5507.533 | 0.922419 | 502.08   | 913.951 | 0.8642   | 0.114918 | 0.520482 |
| Interrogated by both, DE by RNA-seq | ENSG000031 | 133.0829 | 255.3771 | 0.940304 | 11.5286  | 22.8479 | 0.986844 | 0.224474 | 0.312881 |
| Interrogated by both, DE by RNA-seq | ENSG000032 | 344.9919 | 663.2044 | 0.942891 | 18.7418  | 40.1022 | 1.097422 | 0.067237 | 0.644128 |
| Interrogated by both, DE by RNA-seq | ENSG000033 | 626.5994 | 1207.148 | 0.945987 | 47.083   | 92.2608 | 0.970512 | 0.02131  | 0.926568 |
| Interrogated by both, DE by RNA-seq | ENSG000034 | 12.49021 | 24.1     | 0.948235 | 0.725959 | 1.40916 | 0.956875 | -0.4523  | 0.05502  |

|                                     |            |          |          |          |          |         |          |          |          |
|-------------------------------------|------------|----------|----------|----------|----------|---------|----------|----------|----------|
| Interrogated by both, DE by RNA-seq | ENSG000001 | 167.1341 | 322.5318 | 0.948436 | 9.44767  | 23.2314 | 1.298046 | 0.019945 | 0.897759 |
| Interrogated by both, DE by RNA-seq | ENSG000001 | 311.4025 | 601.2025 | 0.94907  | 23.9683  | 48.2193 | 1.008483 | 0.282343 | 0.122814 |
| Interrogated by both, DE by RNA-seq | ENSG000001 | 421.8157 | 814.8033 | 0.949839 | 27.4846  | 56.9582 | 1.05128  | 0.284514 | 0.111982 |
| Interrogated by both, DE by RNA-seq | ENSG000001 | 1229.99  | 2386.938 | 0.956514 | 91.3867  | 180.15  | 0.979143 | 0.113172 | 0.527878 |
| Interrogated by both, DE by RNA-seq | ENSG000001 | 331.3698 | 645.1201 | 0.961126 | 25.4316  | 39.8232 | 0.646987 | 0.132513 | 0.396533 |
| Interrogated by both, DE by RNA-seq | ENSG000001 | 366.8522 | 714.7511 | 0.962242 | 37.0748  | 70.6418 | 0.930083 | 0.136154 | 0.414865 |
| Interrogated by both, DE by RNA-seq | ENSG000001 | 168.6626 | 329.7054 | 0.967037 | 24.0041  | 38.7426 | 0.69064  | 0.208693 | 0.275538 |
| Interrogated by both, DE by RNA-seq | ENSG000001 | 103.3679 | 202.5469 | 0.970468 | 28.4547  | 77.7942 | 1.450996 | 0.12251  | 0.525924 |
| Interrogated by both, DE by RNA-seq | ENSG000001 | 380.5222 | 747.6842 | 0.974448 | 36.7798  | 71.7322 | 0.963707 | 0.267051 | 0.227403 |
| Interrogated by both, DE by RNA-seq | ENSG000001 | 1531.312 | 3015.37  | 0.977567 | 114.161  | 200.539 | 0.812813 | 0.060712 | 0.711714 |
| Interrogated by both, DE by RNA-seq | ENSG000001 | 15.0702  | 29.85969 | 0.9865   | 10.5769  | 20.3569 | 0.944601 | 0.063348 | 0.682376 |
| Interrogated by both, DE by RNA-seq | ENSG000001 | 31.64981 | 63.20025 | 0.997733 | 3.47637  | 9.77182 | 1.491046 | 0.294101 | 0.236044 |
| Interrogated by both, DE by RNA-seq | ENSG000001 | 13.27359 | 26.61057 | 1.003441 | 0.128798 | 1.94497 | 3.916566 | 0.007193 | 0.965838 |
| Interrogated by both, DE by RNA-seq | ENSG000001 | 575.5973 | 1154.241 | 1.003813 | 95.8232  | 154.189 | 0.686253 | -0.07705 | 0.606692 |
| Interrogated by both, DE by RNA-seq | ENSG000001 | 29.28545 | 58.74144 | 1.004195 | 4.23708  | 11.0467 | 1.382473 | -0.04557 | 0.742728 |
| Interrogated by both, DE by RNA-seq | ENSG000001 | 3724.574 | 7502.437 | 1.010284 | 172.789  | 324.132 | 0.90757  | 0.310177 | 0.079471 |
| Interrogated by both, DE by RNA-seq | ENSG000001 | 130.8348 | 263.9597 | 1.012571 | 5.39708  | 10.4365 | 0.951387 | 0.187576 | 0.384092 |
| Interrogated by both, DE by RNA-seq | ENSG000001 | 7472.754 | 15111.95 | 1.015977 | 434.513  | 834.872 | 0.942156 | 0.230924 | 0.198318 |
| Interrogated by both, DE by RNA-seq | ENSG000001 | 660.3121 | 1339.953 | 1.020962 | 36.2563  | 67.6035 | 0.898866 | 0.058368 | 0.71744  |
| Interrogated by both, DE by RNA-seq | ENSG000001 | 640.9643 | 1304.488 | 1.025167 | 44.9898  | 75.6834 | 0.750379 | -0.1579  | 0.309454 |
| Interrogated by both, DE by RNA-seq | ENSG000001 | 116.5337 | 238.0831 | 1.030718 | 14.3204  | 44.8982 | 1.648586 | 0.217022 | 0.163861 |
| Interrogated by both, DE by RNA-seq | ENSG000001 | 56.82053 | 116.6838 | 1.03812  | 9.57308  | 19.1484 | 1.000169 | 0.015979 | 0.917658 |
| Interrogated by both, DE by RNA-seq | ENSG000001 | 83.5977  | 172.1312 | 1.041973 | 12.7718  | 27.7669 | 1.120404 | 0.016984 | 0.92527  |
| Interrogated by both, DE by RNA-seq | ENSG000001 | 74.24585 | 153.4314 | 1.047212 | 5.96739  | 20.0745 | 1.750192 | 0.073504 | 0.653255 |
| Interrogated by both, DE by RNA-seq | ENSG000001 | 92.21379 | 191.6067 | 1.055093 | 2.78208  | 7.9016  | 1.505981 | 0.021642 | 0.908321 |
| Interrogated by both, DE by RNA-seq | ENSG000001 | 378.1645 | 792.6033 | 1.067585 | 20.2791  | 42.8336 | 1.078749 | 0.456797 | 0.067632 |
| Interrogated by both, DE by RNA-seq | ENSG000001 | 6003     | 12592.63 | 1.068824 | 463.903  | 882.814 | 0.928286 | 0.082891 | 0.65327  |
| Interrogated by both, DE by RNA-seq | ENSG000001 | 35.7428  | 75.00678 | 1.069368 | 1.50083  | 2.61114 | 0.798919 | -0.15654 | 0.757362 |
| Interrogated by both, DE by RNA-seq | ENSG000001 | 63.34057 | 134.712  | 1.088676 | 4.38366  | 12.3197 | 1.490759 | 0.054295 | 0.721015 |
| Interrogated by both, DE by RNA-seq | ENSG000001 | 2862.325 | 6139.689 | 1.100978 | 78.8998  | 160.879 | 1.027882 | 0.260521 | 0.367725 |
| Interrogated by both, DE by RNA-seq | ENSG000001 | 3902.168 | 8385.655 | 1.103647 | 291.327  | 579.503 | 0.992177 | 0.382982 | 0.099411 |
| Interrogated by both, DE by RNA-seq | ENSG000001 | 193.5686 | 417.4719 | 1.108835 | 43.5418  | 91.7487 | 1.075287 | 0.434417 | 0.076274 |
| Interrogated by both, DE by RNA-seq | ENSG000001 | 107.7938 | 232.5707 | 1.109395 | 25.6413  | 54.7725 | 1.094982 | 0.124545 | 0.493754 |
| Interrogated by both, DE by RNA-seq | ENSG000001 | 96.54992 | 208.7925 | 1.112723 | 0.922208 | 3.40928 | 1.886303 | 0.129231 | 0.455426 |



|                                     |            |          |          |          |          |          |          |          |          |
|-------------------------------------|------------|----------|----------|----------|----------|----------|----------|----------|----------|
| Interrogated by both, DE by RNA-seq | ENSG000001 | 120.7457 | 261.3202 | 1.113847 | 18.2929  | 37.2798  | 1.02711  | 0.485669 | 0.073594 |
| Interrogated by both, DE by RNA-seq | ENSG000001 | 631.101  | 1385.954 | 1.134936 | 56.999   | 92.8149  | 0.70342  | 0.011075 | 0.934431 |
| Interrogated by both, DE by RNA-seq | ENSG000001 | 74.08626 | 164.2685 | 1.148778 | 9.51002  | 21.0553  | 1.146663 | 0.350393 | 0.062338 |
| Interrogated by both, DE by RNA-seq | ENSG000001 | 54.71927 | 121.5063 | 1.15091  | 0.624581 | 5.12003  | 3.035192 | 0.475611 | 0.253507 |
| Interrogated by both, DE by RNA-seq | ENSG000001 | 29.11628 | 65.42186 | 1.167947 | 1.59231  | 3.9533   | 1.311936 | 0.065811 | 0.769977 |
| Interrogated by both, DE by RNA-seq | ENSG000001 | 974.7128 | 2202.772 | 1.176271 | 35.8034  | 74.6433  | 1.059916 | 0.203342 | 0.455191 |
| Interrogated by both, DE by RNA-seq | ENSG000001 | 107.2256 | 244.9317 | 1.19173  | 6.30493  | 13.013   | 1.045401 | -0.2878  | 0.45102  |
| Interrogated by both, DE by RNA-seq | ENSG000001 | 1614.842 | 3713.341 | 1.201325 | 92.0618  | 222.508  | 1.273183 | 0.004996 | 0.980035 |
| Interrogated by both, DE by RNA-seq | ENSG000001 | 2456.967 | 5691.33  | 1.211887 | 68.3977  | 161.19   | 1.236743 | 0.028631 | 0.86159  |
| Interrogated by both, DE by RNA-seq | ENSG000001 | 5236.497 | 12142.17 | 1.213353 | 733.656  | 1590.2   | 1.116033 | 0.109131 | 0.619423 |
| Interrogated by both, DE by RNA-seq | ENSG000001 | 194.7665 | 465.7158 | 1.257705 | 14.7424  | 25.5249  | 0.791934 | 0.572864 | 0.08994  |
| Interrogated by both, DE by RNA-seq | ENSG000001 | 86.30766 | 206.812  | 1.260759 | 36.6991  | 84.7249  | 1.207041 | 0.29333  | 0.216823 |
| Interrogated by both, DE by RNA-seq | ENSG000001 | 3088.364 | 7450.3   | 1.270456 | 138.776  | 317.307  | 1.193121 | 0.285186 | 0.090064 |
| Interrogated by both, DE by RNA-seq | ENSG000001 | 258.4728 | 625.2587 | 1.27444  | 32.2173  | 74.3206  | 1.205927 | 0.066289 | 0.78202  |
| Interrogated by both, DE by RNA-seq | ENSG000001 | 165.1359 | 400.8707 | 1.279483 | 27.0359  | 53.5887  | 0.987052 | 0.327811 | 0.108935 |
| Interrogated by both, DE by RNA-seq | ENSG000001 | 865.4262 | 2110.277 | 1.28595  | 63.2159  | 134.064  | 1.084563 | 0.239035 | 0.150156 |
| Interrogated by both, DE by RNA-seq | ENSG000001 | 225.0451 | 553.9828 | 1.299627 | 1.39E-07 | 0.003055 | 14.42401 | 0.283907 | 0.069541 |
| Interrogated by both, DE by RNA-seq | ENSG000001 | 45.3067  | 114.3003 | 1.335033 | 3.39647  | 9.75171  | 1.521619 | 0.225507 | 0.358538 |
| Interrogated by both, DE by RNA-seq | ENSG000001 | 195.6401 | 503.3138 | 1.363256 | 27.422   | 67.2826  | 1.2949   | 0.548384 | 0.123875 |
| Interrogated by both, DE by RNA-seq | ENSG000001 | 86.61078 | 222.878  | 1.363636 | 14.094   | 54.5238  | 1.951805 | 0.115544 | 0.481109 |
| Interrogated by both, DE by RNA-seq | ENSG000001 | 14.87754 | 38.3688  | 1.366798 | 0.610633 | 25.2352  | 5.368988 | -0.17959 | 0.451949 |
| Interrogated by both, DE by RNA-seq | ENSG000001 | 508.775  | 1334.399 | 1.39109  | 78.7874  | 212.2    | 1.429388 | 0.404742 | 0.257434 |
| Interrogated by both, DE by RNA-seq | ENSG000001 | 13.69425 | 35.97785 | 1.393538 | 0.597495 | 1.53729  | 1.363391 | -0.14197 | 0.554724 |
| Interrogated by both, DE by RNA-seq | ENSG000001 | 196.4514 | 518.3114 | 1.399647 | 24.8294  | 73.5153  | 1.565995 | 0.315355 | 0.141428 |
| Interrogated by both, DE by RNA-seq | ENSG000001 | 261.2765 | 708.1846 | 1.438548 | 48.6409  | 129.228  | 1.409677 | 0.175683 | 0.28235  |
| Interrogated by both, DE by RNA-seq | ENSG000001 | 15.61435 | 42.49464 | 1.444408 | 0.837908 | 2.87986  | 1.781135 | -0.11049 | 0.514339 |
| Interrogated by both, DE by RNA-seq | ENSG000001 | 27.57106 | 75.35032 | 1.450459 | 2.79796  | 7.72209  | 1.464616 | 0.110678 | 0.671777 |
| Interrogated by both, DE by RNA-seq | ENSG000001 | 1942.434 | 5337.006 | 1.458165 | 201.006  | 463.703  | 1.205962 | 0.01391  | 0.947164 |
| Interrogated by both, DE by RNA-seq | ENSG000001 | 75.6481  | 212.2889 | 1.488653 | 3.37231  | 7.59091  | 1.170536 | 0.25319  | 0.309726 |
| Interrogated by both, DE by RNA-seq | ENSG000001 | 14012.4  | 39527.29 | 1.496145 | 488.567  | 1372.91  | 1.490609 | 0.450757 | 0.215114 |
| Interrogated by both, DE by RNA-seq | ENSG000001 | 353.7228 | 1041.39  | 1.557819 | 11.7318  | 32.131   | 1.453542 | 0.518689 | 0.065686 |
| Interrogated by both, DE by RNA-seq | ENSG000001 | 222.6859 | 656.0559 | 1.558809 | 26.6721  | 73.7916  | 1.468125 | 0.343841 | 0.249067 |
| Interrogated by both, DE by RNA-seq | ENSG000001 | 651.5638 | 1924.031 | 1.562153 | 21.8195  | 62.3184  | 1.51404  | 0.53876  | 0.075557 |
| Interrogated by both, DE by RNA-seq | ENSG000001 | 33.97262 | 105.1385 | 1.629847 | 20.7925  | 67.192   | 1.692226 | 0.150707 | 0.434317 |

|                                                |            |          |          |          |          |          |          |          |          |
|------------------------------------------------|------------|----------|----------|----------|----------|----------|----------|----------|----------|
| Interrogated by both, DE by RNA-seq            | ENSG000001 | 939.7781 | 2919.72  | 1.635438 | 77.2473  | 224.112  | 1.536663 | 0.557547 | 0.082732 |
| Interrogated by both, DE by RNA-seq            | ENSG000001 | 243.7529 | 761.1908 | 1.642838 | 72.559   | 216.946  | 1.58011  | 0.539674 | 0.326963 |
| Interrogated by both, DE by RNA-seq            | ENSG000001 | 3.111907 | 9.967427 | 1.679422 | 0.990881 | 4.35932  | 2.137319 | 0.11074  | 0.726199 |
| Interrogated by both, DE by RNA-seq            | ENSG000001 | 32.07532 | 105.0416 | 1.711425 | 2.54235  | 9.90169  | 1.961512 | 0.087032 | 0.606131 |
| Interrogated by both, DE by RNA-seq            | ENSG000001 | 380.1264 | 1287.854 | 1.760418 | 34.5401  | 118.352  | 1.77674  | 0.581874 | 0.115108 |
| Interrogated by both, DE by RNA-seq            | ENSG000001 | 460.2175 | 1576.184 | 1.776049 | 37.1296  | 128.144  | 1.787124 | 0.38147  | 0.145551 |
| Interrogated by both, DE by RNA-seq            | ENSG000001 | 3940.184 | 13838.96 | 1.8124   | 338.613  | 891.241  | 1.396178 | 0.431273 | 0.273167 |
| Interrogated by both, DE by RNA-seq            | ENSG000001 | 829.0377 | 3033.645 | 1.871543 | 126.99   | 441.009  | 1.796093 | -0.16933 | 0.641024 |
| Interrogated by both, DE by RNA-seq            | ENSG000001 | 158.1309 | 579.7312 | 1.874265 | 13.073   | 83.1165  | 2.668545 | 0.338946 | 0.212118 |
| Interrogated by both, DE by RNA-seq            | ENSG000001 | 247.9644 | 999.0823 | 2.010471 | 30.0879  | 104.818  | 1.800631 | 0.472916 | 0.217818 |
| Interrogated by both, DE by RNA-seq            | ENSG000001 | 3.901533 | 15.72959 | 2.011368 | 0.21433  | 0.854174 | 1.994696 | 0.209523 | 0.210467 |
| Interrogated by both, DE by RNA-seq            | ENSG000001 | 392.5296 | 1937.344 | 2.303207 | 25.9097  | 113.869  | 2.135811 | 0.394771 | 0.323577 |
| Interrogated by both, DE by RNA-seq            | ENSG000001 | 78.52631 | 836.934  | 3.413866 | 5.46637  | 94.1048  | 4.105613 | 0.160182 | 0.452853 |
| Interrogated by both, DE by RNA-seq            | ENSG000001 | 294.1506 | 20781.63 | 6.14261  | 1.86599  | 100.97   | 5.757842 | 0.45351  | 0.312149 |
| Interrogated by both, DE by RNA-seq and Microa | ENSG000001 | 143.6807 | 7.438977 | -4.27162 | 31.0576  | 1.50031  | -4.37161 | -1.41974 | 0.004334 |
| Interrogated by both, DE by RNA-seq and Microa | ENSG000001 | 995.9724 | 90.95152 | -3.45294 | 64.214   | 5.11972  | -3.64875 | -1.90676 | 0.006558 |
| Interrogated by both, DE by RNA-seq and Microa | ENSG000001 | 255434.8 | 27566.74 | -3.21195 | 24276.5  | 2678.5   | -3.18006 | -1.32093 | 0.015777 |
| Interrogated by both, DE by RNA-seq and Microa | ENSG000001 | 439.6635 | 76.12906 | -2.52988 | 26.3942  | 5.40356  | -2.28824 | -1.64233 | 0.002179 |
| Interrogated by both, DE by RNA-seq and Microa | ENSG000001 | 735.0953 | 136.5193 | -2.42883 | 72.6037  | 24.8959  | -1.54413 | -1.11252 | 0.021419 |
| Interrogated by both, DE by RNA-seq and Microa | ENSG000001 | 395.5785 | 77.78999 | -2.34631 | 25.4141  | 5.70819  | -2.15452 | -1.6656  | 0.000619 |
| Interrogated by both, DE by RNA-seq and Microa | ENSG000001 | 1514.962 | 299.5262 | -2.33853 | 287.24   | 84.3368  | -1.76802 | -0.91531 | 0.08025  |
| Interrogated by both, DE by RNA-seq and Microa | ENSG000001 | 444.523  | 90.7292  | -2.29262 | 35.5224  | 12.812   | -1.47123 | -0.82913 | 0.01139  |
| Interrogated by both, DE by RNA-seq and Microa | ENSG000001 | 86706.26 | 18629.44 | -2.21855 | 8540.88  | 1477.05  | -2.53167 | -0.80558 | 0.013837 |
| Interrogated by both, DE by RNA-seq and Microa | ENSG000001 | 566.3277 | 131.1613 | -2.11029 | 40.7079  | 10.3643  | -1.97369 | -1.70089 | 0.008576 |
| Interrogated by both, DE by RNA-seq and Microa | ENSG000001 | 240.6685 | 58.5224  | -2.03999 | 30.9179  | 7.32128  | -2.07827 | -1.32449 | 0.005628 |
| Interrogated by both, DE by RNA-seq and Microa | ENSG000001 | 389.8298 | 96.32493 | -2.01686 | 30.7582  | 6.5037   | -2.24164 | -1.5313  | 0.108729 |
| Interrogated by both, DE by RNA-seq and Microa | ENSG000001 | 1415.106 | 394.3243 | -1.84346 | 25.5844  | 5.76696  | -2.14938 | -0.88055 | 0.046642 |
| Interrogated by both, DE by RNA-seq and Microa | ENSG000001 | 2675.879 | 755.355  | -1.82479 | 189.954  | 61.1017  | -1.63637 | -1.7066  | 0.001494 |
| Interrogated by both, DE by RNA-seq and Microa | ENSG000001 | 882.1967 | 263.7401 | -1.74198 | 75.8443  | 19.9345  | -1.92777 | -0.74392 | 0.002815 |
| Interrogated by both, DE by RNA-seq and Microa | ENSG000001 | 488.7481 | 147.2842 | -1.73049 | 39.1137  | 10.5245  | -1.89392 | -0.74283 | 0.017001 |
| Interrogated by both, DE by RNA-seq and Microa | ENSG000001 | 1640.327 | 508.2321 | -1.69042 | 78.9427  | 22.0468  | -1.84024 | -2.32753 | 0.016134 |
| Interrogated by both, DE by RNA-seq and Microa | ENSG000001 | 2564.267 | 817.5005 | -1.64925 | 273.299  | 93.0135  | -1.55497 | -2.0587  | 0.073788 |
| Interrogated by both, DE by RNA-seq and Microa | ENSG000001 | 3833.466 | 1309.738 | -1.54937 | 150.034  | 48.107   | -1.64097 | -0.88928 | 0.002892 |
| Interrogated by both, DE by RNA-seq and Microa | ENSG000001 | 284.6921 | 98.53697 | -1.53067 | 31.8843  | 11.5564  | -1.46415 | -0.72702 | 0.0119   |

|                                                |           |          |          |          |          |          |          |          |          |
|------------------------------------------------|-----------|----------|----------|----------|----------|----------|----------|----------|----------|
| Interrogated by both, DE by RNA-seq and Microa | ENSG00000 | 917.7315 | 320.6661 | -1.517   | 36.1096  | 11.2159  | -1.68684 | -0.66931 | 0.035371 |
| Interrogated by both, DE by RNA-seq and Microa | ENSG00000 | 2306.319 | 823.3552 | -1.48601 | 286.936  | 130.927  | -1.13197 | -1.26075 | 0.192166 |
| Interrogated by both, DE by RNA-seq and Microa | ENSG00000 | 603.6922 | 215.5751 | -1.48562 | 31.5113  | 11.48    | -1.45675 | -0.80667 | 0.041483 |
| Interrogated by both, DE by RNA-seq and Microa | ENSG00000 | 609.0209 | 217.8447 | -1.48319 | 37.8462  | 12.2029  | -1.63292 | -0.65019 | 0.075987 |
| Interrogated by both, DE by RNA-seq and Microa | ENSG00000 | 55.6577  | 20.42338 | -1.44636 | 35.7645  | 5.94769  | -2.58813 | -1.08664 | 0.049648 |
| Interrogated by both, DE by RNA-seq and Microa | ENSG00000 | 768.5688 | 283.6533 | -1.43805 | 129.326  | 48.7687  | -1.40698 | -0.54363 | 0.017031 |
| Interrogated by both, DE by RNA-seq and Microa | ENSG00000 | 309.2274 | 116.681  | -1.4061  | 9.45856  | 0.811062 | -3.54374 | -0.72136 | 0.087722 |
| Interrogated by both, DE by RNA-seq and Microa | ENSG00000 | 2820.057 | 1073.891 | -1.39288 | 148.232  | 62.0358  | -1.25668 | -1.10986 | 0.032345 |
| Interrogated by both, DE by RNA-seq and Microa | ENSG00000 | 285.8603 | 108.8799 | -1.39257 | 20.1237  | 5.69314  | -1.8216  | -1.22299 | 0.00807  |
| Interrogated by both, DE by RNA-seq and Microa | ENSG00000 | 364.167  | 140.5329 | -1.37369 | 4.45947  | 1.23203  | -1.85583 | -0.59728 | 0.238608 |
| Interrogated by both, DE by RNA-seq and Microa | ENSG00000 | 445.1461 | 173.2038 | -1.36181 | 27.6325  | 10.6762  | -1.37197 | -0.69562 | 0.10861  |
| Interrogated by both, DE by RNA-seq and Microa | ENSG00000 | 705.9677 | 286.3886 | -1.30163 | 51.8268  | 23.7477  | -1.12591 | -0.84994 | 0.038217 |
| Interrogated by both, DE by RNA-seq and Microa | ENSG00000 | 948.0781 | 387.2386 | -1.29178 | 173.233  | 74.6239  | -1.215   | -1.50813 | 0.05821  |
| Interrogated by both, DE by RNA-seq and Microa | ENSG00000 | 838.7524 | 345.3511 | -1.28018 | 37.9834  | 21.4379  | -0.82521 | 0.942356 | 0.028013 |
| Interrogated by both, DE by RNA-seq and Microa | ENSG00000 | 126.5162 | 52.24995 | -1.27582 | 32.3079  | 9.05553  | -1.83502 | -0.81232 | 0.006286 |
| Interrogated by both, DE by RNA-seq and Microa | ENSG00000 | 697.901  | 295.8551 | -1.23813 | 24.839   | 9.01174  | -1.46273 | -0.85104 | 0.254375 |
| Interrogated by both, DE by RNA-seq and Microa | ENSG00000 | 133.3766 | 56.97394 | -1.22713 | 11.9163  | 3.96222  | -1.58856 | -0.56207 | 0.015806 |
| Interrogated by both, DE by RNA-seq and Microa | ENSG00000 | 5115.828 | 2244.969 | -1.18827 | 301.303  | 145.447  | -1.05072 | -0.44218 | 0.028194 |
| Interrogated by both, DE by RNA-seq and Microa | ENSG00000 | 1158.006 | 561.6839 | -1.04381 | 99.9811  | 44.4956  | -1.16799 | -0.33741 | 0.045811 |
| Interrogated by both, DE by RNA-seq and Microa | ENSG00000 | 900.0319 | 459.2205 | -0.97079 | 153.085  | 71.7328  | -1.09363 | -0.59097 | 0.008699 |
| Interrogated by both, DE by RNA-seq and Microa | ENSG00000 | 1895.05  | 970.7156 | -0.96512 | 99.1863  | 52.6384  | -0.91403 | -2.52694 | 0.054722 |
| Interrogated by both, DE by RNA-seq and Microa | ENSG00000 | 448.2329 | 230.6799 | -0.95836 | 48.6666  | 23.2893  | -1.06326 | -0.6382  | 0.005765 |
| Interrogated by both, DE by RNA-seq and Microa | ENSG00000 | 309.8388 | 160.2613 | -0.95109 | 41.1549  | 15.8681  | -1.37493 | -0.50779 | 0.019527 |
| Interrogated by both, DE by RNA-seq and Microa | ENSG00000 | 931.416  | 484.5737 | -0.94271 | 46.3984  | 22.894   | -1.01911 | -0.43844 | 0.04162  |
| Interrogated by both, DE by RNA-seq and Microa | ENSG00000 | 1887.915 | 982.9364 | -0.94162 | 109.171  | 50.473   | -1.11301 | -1.02288 | 0.015566 |
| Interrogated by both, DE by RNA-seq and Microa | ENSG00000 | 3560.757 | 1983.749 | -0.84395 | 510.062  | 312.427  | -0.70715 | -0.45605 | 0.034001 |
| Interrogated by both, DE by RNA-seq and Microa | ENSG00000 | 13.76534 | 7.844186 | -0.81134 | 0.865224 | 0.003915 | -7.78798 | -0.39985 | 0.013589 |
| Interrogated by both, DE by RNA-seq and Microa | ENSG00000 | 21.68385 | 12.83753 | -0.75625 | 2.82     | 0.135675 | -4.37747 | -0.29661 | 0.045168 |
| Interrogated by both, DE by RNA-seq and Microa | ENSG00000 | 3645.23  | 2183.692 | -0.73924 | 64.1248  | 33.4169  | -0.9403  | -0.75217 | 0.116024 |
| Interrogated by both, DE by RNA-seq and Microa | ENSG00000 | 177.8355 | 106.808  | -0.73552 | 32.7524  | 0.389088 | -6.39536 | -1.01813 | 0.012084 |
| Interrogated by both, DE by RNA-seq and Microa | ENSG00000 | 530.849  | 321.5178 | -0.7234  | 43.9601  | 19.0889  | -1.20346 | -0.40981 | 0.030287 |
| Interrogated by both, DE by RNA-seq and Microa | ENSG00000 | 26.38867 | 16.08809 | -0.71393 | 0.533719 | 0.00104  | -9.00339 | -0.98686 | 0.087338 |
| Interrogated by both, DE by RNA-seq and Microa | ENSG00000 | 41.5034  | 25.7959  | -0.68609 | 2.05098  | 0.492051 | -2.05943 | -0.70598 | 0.020835 |
| Interrogated by both, DE by RNA-seq and Microa | ENSG00000 | 1123.997 | 712.8577 | -0.65695 | 261.202  | 148.923  | -0.8106  | -0.72557 | 0.029313 |

|                                                |           |          |          |          |          |          |          |          |          |
|------------------------------------------------|-----------|----------|----------|----------|----------|----------|----------|----------|----------|
| Interrogated by both, DE by RNA-seq and Microa | ENSG00000 | 66.7767  | 42.42505 | -0.65443 | 3.80358  | 1.54113  | -1.30337 | -0.33933 | 0.035485 |
| Interrogated by both, DE by RNA-seq and Microa | ENSG00000 | 247.1853 | 158.6297 | -0.63993 | 103.138  | 61.464   | -0.74676 | -0.50059 | 0.012174 |
| Interrogated by both, DE by RNA-seq and Microa | ENSG00000 | 1707.981 | 1110.446 | -0.62115 | 128.686  | 79.6821  | -0.69153 | -0.49647 | 0.02917  |
| Interrogated by both, DE by RNA-seq and Microa | ENSG00000 | 576.4351 | 374.922  | -0.62057 | 65.5961  | 33.2054  | -0.98219 | -0.57345 | 0.027456 |
| Interrogated by both, DE by RNA-seq and Microa | ENSG00000 | 325.8359 | 212.3001 | -0.61804 | 92.4986  | 51.6158  | -0.84162 | -0.65256 | 0.010958 |
| Interrogated by both, DE by RNA-seq and Microa | ENSG00000 | 542.573  | 823.8119 | 0.602498 | 12.2109  | 23.534   | 0.946577 | 0.68716  | 0.01678  |
| Interrogated by both, DE by RNA-seq and Microa | ENSG00000 | 1567.918 | 2391.756 | 0.609221 | 235.573  | 424.843  | 0.850756 | 0.39391  | 0.045549 |
| Interrogated by both, DE by RNA-seq and Microa | ENSG00000 | 1326.678 | 2098.589 | 0.661602 | 62.8803  | 97.5514  | 0.633554 | 0.381828 | 0.018272 |
| Interrogated by both, DE by RNA-seq and Microa | ENSG00000 | 593.0546 | 938.4522 | 0.662118 | 58.6322  | 99.26    | 0.759519 | 0.299885 | 0.043358 |
| Interrogated by both, DE by RNA-seq and Microa | ENSG00000 | 183.1337 | 290.7402 | 0.666833 | 0.008097 | 0.018963 | 1.227693 | 0.524021 | 0.023701 |
| Interrogated by both, DE by RNA-seq and Microa | ENSG00000 | 229.2407 | 370.9878 | 0.694509 | 47.9395  | 93.0851  | 0.957335 | 0.50264  | 0.014002 |
| Interrogated by both, DE by RNA-seq and Microa | ENSG00000 | 803.5804 | 1313.63  | 0.709044 | 61.9117  | 103.907  | 0.747009 | 0.389683 | 0.022435 |
| Interrogated by both, DE by RNA-seq and Microa | ENSG00000 | 3697.042 | 6498.528 | 0.813742 | 173.023  | 274.566  | 0.666189 | 0.722343 | 0.064853 |
| Interrogated by both, DE by RNA-seq and Microa | ENSG00000 | 16906.69 | 29980.99 | 0.826454 | 280.751  | 439.007  | 0.644953 | 0.598881 | 0.006742 |
| Interrogated by both, DE by RNA-seq and Microa | ENSG00000 | 1467.854 | 2625.937 | 0.839124 | 152.295  | 274.601  | 0.850468 | 0.419029 | 0.041228 |
| Interrogated by both, DE by RNA-seq and Microa | ENSG00000 | 2412.604 | 4430.085 | 0.876743 | 199.413  | 369.353  | 0.889241 | 0.38914  | 0.032998 |
| Interrogated by both, DE by RNA-seq and Microa | ENSG00000 | 221.7297 | 424.1437 | 0.935751 | 0.000159 | 0.000257 | 0.69033  | 0.388026 | 0.032939 |
| Interrogated by both, DE by RNA-seq and Microa | ENSG00000 | 350.7838 | 680.1412 | 0.955252 | 26.2216  | 57.4213  | 1.13083  | 0.338805 | 0.048785 |
| Interrogated by both, DE by RNA-seq and Microa | ENSG00000 | 443.7193 | 893.0264 | 1.009055 | 35.2702  | 71.3659  | 1.016785 | 0.550624 | 0.041542 |
| Interrogated by both, DE by RNA-seq and Microa | ENSG00000 | 1170.007 | 2394.164 | 1.033004 | 39.6314  | 75.8575  | 0.936648 | 0.922186 | 0.002099 |
| Interrogated by both, DE by RNA-seq and Microa | ENSG00000 | 11344.59 | 23303.07 | 1.038516 | 102.4    | 197.699  | 0.94909  | 0.559731 | 0.002324 |
| Interrogated by both, DE by RNA-seq and Microa | ENSG00000 | 48.58211 | 100.3589 | 1.046672 | 2.55985  | 24.411   | 3.2534   | 0.316108 | 0.042107 |
| Interrogated by both, DE by RNA-seq and Microa | ENSG00000 | 329.9589 | 726.1911 | 1.138063 | 42.8306  | 90.9032  | 1.085689 | 0.298921 | 0.043979 |
| Interrogated by both, DE by RNA-seq and Microa | ENSG00000 | 278.0459 | 631.5112 | 1.183485 | 47.9762  | 104.484  | 1.122891 | 0.653411 | 0.072798 |
| Interrogated by both, DE by RNA-seq and Microa | ENSG00000 | 1513.613 | 3483.054 | 1.202356 | 107.912  | 260.741  | 1.272762 | 0.818221 | 0.008342 |
| Interrogated by both, DE by RNA-seq and Microa | ENSG00000 | 256.0971 | 593.5929 | 1.212783 | 24.6393  | 57.9843  | 1.234701 | 0.792891 | 0.02831  |
| Interrogated by both, DE by RNA-seq and Microa | ENSG00000 | 422.739  | 1021.676 | 1.273098 | 72.6139  | 163.898  | 1.174481 | 0.747344 | 0.016599 |
| Interrogated by both, DE by RNA-seq and Microa | ENSG00000 | 38.11634 | 94.57031 | 1.310978 | 1.13297  | 2.5736   | 1.183678 | 0.978107 | 0.002891 |
| Interrogated by both, DE by RNA-seq and Microa | ENSG00000 | 268.8954 | 672.6392 | 1.322788 | 25.8787  | 64.8523  | 1.325393 | 0.703228 | 0.025812 |
| Interrogated by both, DE by RNA-seq and Microa | ENSG00000 | 626.4464 | 1633.521 | 1.382722 | 20.2546  | 46.689   | 1.204833 | 0.591359 | 0.008691 |
| Interrogated by both, DE by RNA-seq and Microa | ENSG00000 | 289.4849 | 758.4304 | 1.389529 | 19.0163  | 53.8355  | 1.501321 | 0.59621  | 0.033372 |
| Interrogated by both, DE by RNA-seq and Microa | ENSG00000 | 510.7714 | 1339.242 | 1.390667 | 21.0638  | 63.7853  | 1.598458 | 0.670138 | 0.237901 |
| Interrogated by both, DE by RNA-seq and Microa | ENSG00000 | 306.6138 | 814.8023 | 1.410028 | 94.4     | 242.563  | 1.361501 | 0.428054 | 0.046583 |
| Interrogated by both, DE by RNA-seq and Microa | ENSG00000 | 2970.592 | 7903.848 | 1.411804 | 207.76   | 556.983  | 1.422715 | 1.363348 | 0.019714 |

|                                                |           |          |          |          |          |          |          |          |          |
|------------------------------------------------|-----------|----------|----------|----------|----------|----------|----------|----------|----------|
| Interrogated by both, DE by RNA-seq and Microa | ENSG00000 | 465.2013 | 1242.902 | 1.417785 | 14.7572  | 38.0457  | 1.366314 | 1.183894 | 0.038161 |
| Interrogated by both, DE by RNA-seq and Microa | ENSG00000 | 301.6653 | 810.6955 | 1.426211 | 8.36075  | 24.3932  | 1.544775 | 0.949916 | 0.001935 |
| Interrogated by both, DE by RNA-seq and Microa | ENSG00000 | 1595.452 | 4503.333 | 1.497029 | 57.2181  | 156.92   | 1.455486 | 0.651547 | 0.017329 |
| Interrogated by both, DE by RNA-seq and Microa | ENSG00000 | 196.6144 | 559.124  | 1.507799 | 62.405   | 147.563  | 1.241597 | 0.713278 | 0.01042  |
| Interrogated by both, DE by RNA-seq and Microa | ENSG00000 | 9878.467 | 28187.34 | 1.512688 | 372.383  | 1246.37  | 1.742873 | 0.865951 | 0.007755 |
| Interrogated by both, DE by RNA-seq and Microa | ENSG00000 | 1635.306 | 4732.179 | 1.532944 | 86.2767  | 242.948  | 1.493605 | 0.653209 | 0.093028 |
| Interrogated by both, DE by RNA-seq and Microa | ENSG00000 | 10445.11 | 30926.48 | 1.566015 | 630.493  | 1984.98  | 1.654572 | 0.899267 | 0.001568 |
| Interrogated by both, DE by RNA-seq and Microa | ENSG00000 | 166.1782 | 513.0476 | 1.626361 | 26.4652  | 76.0793  | 1.523407 | 0.49763  | 0.027127 |
| Interrogated by both, DE by RNA-seq and Microa | ENSG00000 | 302.5512 | 1025.508 | 1.761087 | 18.6672  | 58.264   | 1.642099 | 1.076303 | 0.00202  |
| Interrogated by both, DE by RNA-seq and Microa | ENSG00000 | 16.53275 | 62.45746 | 1.917548 | 4.64192  | 17.3267  | 1.900203 | 0.631106 | 0.022916 |
| Interrogated by both, DE by RNA-seq and Microa | ENSG00000 | 57.99208 | 240.715  | 2.053398 | 6.23876  | 30.7616  | 2.301799 | 1.911809 | 0.018567 |
| Interrogated by both, DE by RNA-seq and Microa | ENSG00000 | 391.0167 | 1817.137 | 2.216365 | 28.1875  | 132.988  | 2.238169 | 1.31276  | 0.167557 |
| Interrogated by both, DE by RNA-seq and Microa | ENSG00000 | 1130.701 | 5724.346 | 2.339894 | 204.613  | 735.359  | 1.845551 | 0.752298 | 0.15401  |
| Interrogated by both, DE by RNA-seq and Microa | ENSG00000 | 593.5601 | 3282.356 | 2.467266 | 86.3383  | 448.851  | 2.378164 | 1.114679 | 0.019334 |
| Interrogated by both, DE by RNA-seq and Microa | ENSG00000 | 616.3076 | 3810.221 | 2.628152 | 75.9813  | 490.056  | 2.68923  | 1.992074 | 0.003013 |
| Interrogated by both, DE by RNA-seq and Microa | ENSG00000 | 1640.463 | 12242.1  | 2.899676 | 41.9825  | 311.994  | 2.893658 | 2.056187 | 0.002667 |
| Interrogated by both, DE by RNA-seq and Microa | ENSG00000 | 174.8685 | 1388.645 | 2.989336 | 17.793   | 112.964  | 2.666481 | 1.623992 | 0.122805 |
| Interrogated by both, DE by RNA-seq and Microa | ENSG00000 | 2158.619 | 18406.91 | 3.092067 | 444.131  | 4125.51  | 3.215515 | 2.182255 | 0.000411 |
| Interrogated by both, DE by RNA-seq and Microa | ENSG00000 | 136.6778 | 1181.289 | 3.111511 | 10.5839  | 91.5083  | 3.112031 | 1.959747 | 0.001255 |
| Interrogated by both, DE by RNA-seq and Microa | ENSG00000 | 86.51469 | 2215.785 | 4.678729 | 4.71603  | 106.234  | 4.493529 | 3.964293 | 0.000115 |
| Interrogated by both, DE by RNA-seq and Microa | ENSG00000 | 28.09015 | 1844.388 | 6.036935 | 0.915475 | 58.9247  | 6.008208 | 4.178408 | 0.000336 |
| Interrogated by RNA-seq, DE by RNA-seq         | ENSG00000 | 96.34147 | 27.21151 | -1.82394 | 1.22946  | 0.178789 | -2.78169 | NA       | NA       |
| Interrogated by RNA-seq, DE by RNA-seq         | ENSG00000 | 206.6362 | 63.68368 | -1.6981  | 7.86139  | 1.35552  | -2.53594 | NA       | NA       |
| Interrogated by RNA-seq, DE by RNA-seq         | ENSG00000 | 100.3475 | 31.44881 | -1.67393 | 1.44978  | 0.674392 | -1.10417 | NA       | NA       |
| Interrogated by RNA-seq, DE by RNA-seq         | ENSG00000 | 33.20842 | 11.33652 | -1.55057 | 2.27833  | 0.031727 | -6.16614 | NA       | NA       |
| Interrogated by RNA-seq, DE by RNA-seq         | ENSG00000 | 221.4135 | 81.54866 | -1.44101 | 5.1245   | 6.86E-09 | -29.4766 | NA       | NA       |
| Interrogated by RNA-seq, DE by RNA-seq         | ENSG00000 | 32.68771 | 12.08556 | -1.43546 | 1.1989   | 0.38731  | -1.63015 | NA       | NA       |
| Interrogated by RNA-seq, DE by RNA-seq         | ENSG00000 | 272.7209 | 104.5983 | -1.38257 | 0.70281  | 0.031809 | -4.46565 | NA       | NA       |
| Interrogated by RNA-seq, DE by RNA-seq         | ENSG00000 | 178.2878 | 73.87849 | -1.27098 | 0.832286 | 0.107426 | -2.95374 | NA       | NA       |
| Interrogated by RNA-seq, DE by RNA-seq         | ENSG00000 | 249.1706 | 103.4172 | -1.26866 | 0.448357 | 0.022464 | -4.31899 | NA       | NA       |
| Interrogated by RNA-seq, DE by RNA-seq         | ENSG00000 | 192.0699 | 82.19175 | -1.22457 | 1.47899  | 0.040114 | -5.20436 | NA       | NA       |
| Interrogated by RNA-seq, DE by RNA-seq         | ENSG00000 | 145.0051 | 62.90903 | -1.20477 | 0.964904 | 2.69E-09 | -28.4182 | NA       | NA       |
| Interrogated by RNA-seq, DE by RNA-seq         | ENSG00000 | 1217.458 | 540.0178 | -1.17279 | 0.013971 | 0.004129 | -1.75848 | NA       | NA       |
| Interrogated by RNA-seq, DE by RNA-seq         | ENSG00000 | 59.69391 | 27.21532 | -1.13317 | 3.9809   | 0.152061 | -4.71037 | NA       | NA       |

|                                        |            |          |          |          |          |          |          |    |    |
|----------------------------------------|------------|----------|----------|----------|----------|----------|----------|----|----|
| Interrogated by RNA-seq, DE by RNA-seq | ENSG000001 | 133.4462 | 63.31716 | -1.07559 | 3.81964  | 0.538361 | -2.82679 | NA | NA |
| Interrogated by RNA-seq, DE by RNA-seq | ENSG000002 | 468.6435 | 222.6529 | -1.07369 | 18.2782  | 5.21911  | -1.80825 | NA | NA |
| Interrogated by RNA-seq, DE by RNA-seq | ENSG000003 | 24.03488 | 11.73616 | -1.03417 | 2.18309  | 0.493983 | -2.14384 | NA | NA |
| Interrogated by RNA-seq, DE by RNA-seq | ENSG000004 | 72.3697  | 35.71077 | -1.01903 | 0.004232 | 7.77E-10 | -22.3769 | NA | NA |
| Interrogated by RNA-seq, DE by RNA-seq | ENSG000005 | 45.36421 | 22.62354 | -1.00373 | 2.64895  | 0.228215 | -3.53696 | NA | NA |
| Interrogated by RNA-seq, DE by RNA-seq | ENSG000006 | 234.3174 | 117.9148 | -0.99072 | 3.51383  | 0.099485 | -5.14243 | NA | NA |
| Interrogated by RNA-seq, DE by RNA-seq | ENSG000007 | 156.0103 | 78.82708 | -0.98488 | 4.50299  | 1.17518  | -1.938   | NA | NA |
| Interrogated by RNA-seq, DE by RNA-seq | ENSG000008 | 827.1437 | 418.8614 | -0.98166 | 24.0475  | 10.2644  | -1.22824 | NA | NA |
| Interrogated by RNA-seq, DE by RNA-seq | ENSG000009 | 779.656  | 399.9628 | -0.96297 | 0.725368 | 0.01489  | -5.6063  | NA | NA |
| Interrogated by RNA-seq, DE by RNA-seq | ENSG000010 | 51.01025 | 26.41585 | -0.94938 | 1.83043  | 0.458001 | -1.99876 | NA | NA |
| Interrogated by RNA-seq, DE by RNA-seq | ENSG000011 | 110.4889 | 57.30674 | -0.94712 | 1.64124  | 0.929854 | -0.81971 | NA | NA |
| Interrogated by RNA-seq, DE by RNA-seq | ENSG000012 | 49.25066 | 25.57027 | -0.94568 | 0.701504 | 0.079465 | -3.14206 | NA | NA |
| Interrogated by RNA-seq, DE by RNA-seq | ENSG000013 | 247.2217 | 129.9467 | -0.92789 | 12.1107  | 5.78963  | -1.06474 | NA | NA |
| Interrogated by RNA-seq, DE by RNA-seq | ENSG000014 | 1319.185 | 696.4083 | -0.92164 | 26.3445  | 0.204381 | -7.0101  | NA | NA |
| Interrogated by RNA-seq, DE by RNA-seq | ENSG000015 | 136.787  | 74.71309 | -0.8725  | 3.5404   | 1.78254  | -0.98998 | NA | NA |
| Interrogated by RNA-seq, DE by RNA-seq | ENSG000016 | 174.8924 | 95.82936 | -0.86793 | 2.593    | 0.058028 | -5.48173 | NA | NA |
| Interrogated by RNA-seq, DE by RNA-seq | ENSG000017 | 288.5065 | 158.115  | -0.86763 | 0.454621 | 0.00075  | -9.24282 | NA | NA |
| Interrogated by RNA-seq, DE by RNA-seq | ENSG000018 | 234.1881 | 130.2303 | -0.8466  | 8.43677  | 4.39508  | -0.9408  | NA | NA |
| Interrogated by RNA-seq, DE by RNA-seq | ENSG000019 | 33.85664 | 18.83979 | -0.84566 | 3.55127  | 1.55711  | -1.18946 | NA | NA |
| Interrogated by RNA-seq, DE by RNA-seq | ENSG000020 | 327.4244 | 183.8755 | -0.83243 | 0.670614 | 0.142478 | -2.23474 | NA | NA |
| Interrogated by RNA-seq, DE by RNA-seq | ENSG000021 | 352.6963 | 200.1381 | -0.81743 | 0.083779 | 0.006408 | -3.70868 | NA | NA |
| Interrogated by RNA-seq, DE by RNA-seq | ENSG000022 | 26.92166 | 15.29201 | -0.81599 | 1.02E-07 | 2.54E-10 | -8.64952 | NA | NA |
| Interrogated by RNA-seq, DE by RNA-seq | ENSG000023 | 1351.595 | 801.0749 | -0.75465 | 195.981  | 112.416  | -0.80187 | NA | NA |
| Interrogated by RNA-seq, DE by RNA-seq | ENSG000024 | 11742.9  | 7104.141 | -0.72506 | 619.293  | 355.904  | -0.79913 | NA | NA |
| Interrogated by RNA-seq, DE by RNA-seq | ENSG000025 | 265.9075 | 164.7975 | -0.69023 | 3.25885  | 1.33153  | -1.29128 | NA | NA |
| Interrogated by RNA-seq, DE by RNA-seq | ENSG000026 | 239.9344 | 149.9907 | -0.67777 | 14.1813  | 6.80247  | -1.05986 | NA | NA |
| Interrogated by RNA-seq, DE by RNA-seq | ENSG000027 | 115.5221 | 72.46184 | -0.67288 | 6.52472  | 1.69632  | -1.94351 | NA | NA |
| Interrogated by RNA-seq, DE by RNA-seq | ENSG000028 | 366.9141 | 230.8165 | -0.6687  | 1.6568   | 0.220705 | -2.90821 | NA | NA |
| Interrogated by RNA-seq, DE by RNA-seq | ENSG000029 | 725.6137 | 458.8209 | -0.66127 | 0.112831 | 0.004817 | -4.54985 | NA | NA |
| Interrogated by RNA-seq, DE by RNA-seq | ENSG000030 | 73.51112 | 47.11484 | -0.64178 | 12.3767  | 0.932123 | -3.73096 | NA | NA |
| Interrogated by RNA-seq, DE by RNA-seq | ENSG000031 | 254.0985 | 167.5887 | -0.60046 | 2.14294  | 0.811989 | -1.40006 | NA | NA |
| Interrogated by RNA-seq, DE by RNA-seq | ENSG000032 | 88.68643 | 58.50109 | -0.60025 | 0.292592 | 0.062517 | -2.22656 | NA | NA |
| Interrogated by RNA-seq, DE by RNA-seq | ENSG000033 | 89.24529 | 59.30752 | -0.58956 | 2.73807  | 0.057635 | -5.57008 | NA | NA |
| Interrogated by RNA-seq, DE by RNA-seq | ENSG000034 | 1214.944 | 1862.774 | 0.616563 | 36.5982  | 64.209   | 0.811003 | NA | NA |

|                                        |            |          |          |          |          |          |          |    |    |
|----------------------------------------|------------|----------|----------|----------|----------|----------|----------|----|----|
| Interrogated by RNA-seq, DE by RNA-seq | ENSG000001 | 118.5644 | 187.0201 | 0.657523 | 0.050129 | 0.200774 | 2.001852 | NA | NA |
| Interrogated by RNA-seq, DE by RNA-seq | ENSG000002 | 8.930563 | 14.28895 | 0.678077 | 0.541316 | 1.27402  | 1.234845 | NA | NA |
| Interrogated by RNA-seq, DE by RNA-seq | ENSG000003 | 2116.742 | 3417.846 | 0.691242 | 0.031917 | 0.840386 | 4.718637 | NA | NA |
| Interrogated by RNA-seq, DE by RNA-seq | ENSG000004 | 849.4187 | 1376.739 | 0.696707 | 0.300746 | 4.43092  | 3.880989 | NA | NA |
| Interrogated by RNA-seq, DE by RNA-seq | ENSG000005 | 96.17813 | 157.2159 | 0.708966 | 1.32718  | 2.57444  | 0.955895 | NA | NA |
| Interrogated by RNA-seq, DE by RNA-seq | ENSG000006 | 1840.063 | 3055.077 | 0.731454 | 0.029849 | 0.051383 | 0.783597 | NA | NA |
| Interrogated by RNA-seq, DE by RNA-seq | ENSG000007 | 200.2419 | 335.9733 | 0.746602 | 0.786041 | 3.22404  | 2.036193 | NA | NA |
| Interrogated by RNA-seq, DE by RNA-seq | ENSG000008 | 161.0498 | 272.3639 | 0.758028 | 0.029058 | 0.187567 | 2.690404 | NA | NA |
| Interrogated by RNA-seq, DE by RNA-seq | ENSG000009 | 2048.385 | 3488.322 | 0.768047 | 8.6405   | 25.8295  | 1.579833 | NA | NA |
| Interrogated by RNA-seq, DE by RNA-seq | ENSG000010 | 813.4908 | 1388.5   | 0.77133  | 13.4761  | 22.0335  | 0.709296 | NA | NA |
| Interrogated by RNA-seq, DE by RNA-seq | ENSG000011 | 121.7714 | 208.272  | 0.774294 | 8.8758   | 17.3747  | 0.969039 | NA | NA |
| Interrogated by RNA-seq, DE by RNA-seq | ENSG000012 | 96.35366 | 165.7863 | 0.782913 | 0.111532 | 0.734409 | 2.719126 | NA | NA |
| Interrogated by RNA-seq, DE by RNA-seq | ENSG000013 | 853.2513 | 1474.044 | 0.788737 | 3.27088  | 7.72834  | 1.24048  | NA | NA |
| Interrogated by RNA-seq, DE by RNA-seq | ENSG000014 | 297.6042 | 520.6144 | 0.80682  | 3.92722  | 8.1888   | 1.060144 | NA | NA |
| Interrogated by RNA-seq, DE by RNA-seq | ENSG000015 | 150.705  | 263.6933 | 0.807134 | 0.002409 | 0.715822 | 8.214759 | NA | NA |
| Interrogated by RNA-seq, DE by RNA-seq | ENSG000016 | 974.7265 | 1733.075 | 0.830265 | 37.7052  | 59.4588  | 0.657127 | NA | NA |
| Interrogated by RNA-seq, DE by RNA-seq | ENSG000017 | 5610.898 | 10099.37 | 0.847961 | 191.923  | 319.259  | 0.7342   | NA | NA |
| Interrogated by RNA-seq, DE by RNA-seq | ENSG000018 | 16.77426 | 30.74086 | 0.873908 | 9.41E-09 | 0.001038 | 16.75058 | NA | NA |
| Interrogated by RNA-seq, DE by RNA-seq | ENSG000019 | 414.6386 | 776.5431 | 0.905212 | 11.8709  | 27.9431  | 1.235063 | NA | NA |
| Interrogated by RNA-seq, DE by RNA-seq | ENSG000020 | 11242.87 | 21065.12 | 0.905845 | 1192.04  | 2065.24  | 0.792877 | NA | NA |
| Interrogated by RNA-seq, DE by RNA-seq | ENSG000021 | 78.83785 | 149.9967 | 0.92797  | 3.63627  | 7.19582  | 0.9847   | NA | NA |
| Interrogated by RNA-seq, DE by RNA-seq | ENSG000022 | 304.2234 | 579.7892 | 0.930397 | 1.34554  | 3.82422  | 1.50698  | NA | NA |
| Interrogated by RNA-seq, DE by RNA-seq | ENSG000023 | 102.9434 | 199.0239 | 0.951091 | 6.72782  | 13.184   | 0.970577 | NA | NA |
| Interrogated by RNA-seq, DE by RNA-seq | ENSG000024 | 191.8572 | 382.3342 | 0.994802 | 2.69711  | 11.9733  | 2.150335 | NA | NA |
| Interrogated by RNA-seq, DE by RNA-seq | ENSG000025 | 309.5537 | 641.0422 | 1.05023  | 6.12485  | 12.8289  | 1.066651 | NA | NA |
| Interrogated by RNA-seq, DE by RNA-seq | ENSG000026 | 81.8539  | 173.452  | 1.083414 | 0.00138  | 0.017321 | 3.64932  | NA | NA |
| Interrogated by RNA-seq, DE by RNA-seq | ENSG000027 | 13.17189 | 28.86339 | 1.131778 | 0.424077 | 1.32356  | 1.642025 | NA | NA |
| Interrogated by RNA-seq, DE by RNA-seq | ENSG000028 | 116.5586 | 260.6636 | 1.161134 | 0.954439 | 1.75377  | 0.877735 | NA | NA |
| Interrogated by RNA-seq, DE by RNA-seq | ENSG000029 | 187.688  | 425.2111 | 1.179843 | 15.2024  | 42.9801  | 1.49937  | NA | NA |
| Interrogated by RNA-seq, DE by RNA-seq | ENSG000030 | 58.42215 | 136.7467 | 1.226918 | 0.749666 | 26.363   | 5.136123 | NA | NA |
| Interrogated by RNA-seq, DE by RNA-seq | ENSG000031 | 134.4893 | 319.5526 | 1.248561 | 5.96414  | 12.4438  | 1.061041 | NA | NA |
| Interrogated by RNA-seq, DE by RNA-seq | ENSG000032 | 20.38128 | 52.38863 | 1.362009 | 2.14319  | 6.43477  | 1.586129 | NA | NA |
| Interrogated by RNA-seq, DE by RNA-seq | ENSG000033 | 117.4434 | 302.6963 | 1.365906 | 0.544219 | 0.902683 | 0.730032 | NA | NA |
| Interrogated by RNA-seq, DE by RNA-seq | ENSG000034 | 38.41578 | 99.41303 | 1.371736 | 1.39872  | 2.9023   | 1.053089 | NA | NA |

|                                        |                 |          |          |          |          |          |          |    |    |
|----------------------------------------|-----------------|----------|----------|----------|----------|----------|----------|----|----|
| Interrogated by RNA-seq, DE by RNA-seq | ENSG00000100000 | 193.4533 | 501.1907 | 1.373375 | 2.8281   | 8.93497  | 1.65963  | NA | NA |
| Interrogated by RNA-seq, DE by RNA-seq | ENSG00000100000 | 167.7471 | 447.8093 | 1.416596 | 0.527242 | 5.92139  | 3.489399 | NA | NA |
| Interrogated by RNA-seq, DE by RNA-seq | ENSG00000100000 | 303.6792 | 820.1478 | 1.433336 | 0.005859 | 22.7862  | 11.92521 | NA | NA |
| Interrogated by RNA-seq, DE by RNA-seq | ENSG00000100000 | 310.1906 | 840.4624 | 1.438028 | 1.25E-09 | 22.774   | 34.08474 | NA | NA |
| Interrogated by RNA-seq, DE by RNA-seq | ENSG00000100000 | 140.0066 | 471.7798 | 1.752618 | 9.03552  | 32.7856  | 1.859383 | NA | NA |
| Interrogated by RNA-seq, DE by RNA-seq | ENSG00000100000 | 1032.749 | 3736.412 | 1.855164 | 7.34E-08 | 0.000239 | 11.66942 | NA | NA |
| Interrogated by RNA-seq, DE by RNA-seq | ENSG00000100000 | 82.73426 | 303.259  | 1.873994 | 1.26824  | 1.92777  | 0.604105 | NA | NA |
| Interrogated by RNA-seq, DE by RNA-seq | ENSG00000100000 | 6082.501 | 37065.77 | 2.607351 | 458.033  | 2895.71  | 2.660394 | NA | NA |



| Description        | Chromosome | Associated Gene | Biotype              | Associated Status | (gen Source)    |
|--------------------|------------|-----------------|----------------------|-------------------|-----------------|
| fibronectin        | 20         | FLRT3           | protein_coding       | HGNC (curated)    | KNOWN ensembl   |
|                    | 11         | AC087521        | lincRNA              | Clone-base        | KNOWN ensembl   |
| guanine nucleoside | 22         | GNAZ            | protein_coding       | HGNC (curated)    | KNOWN ensembl   |
|                    | 7          | AC011899        | processed_transcript | Clone-base        | PUTATIVE havana |
|                    | 1          | RP11-307C       | processed_transcript | Clone-base        | NOVEL havana    |
|                    | 10         | RP11-211N       | processed_transcript | Clone-base        | NOVEL havana    |
| WD repeat          | 20         | AL035661        | lincRNA              | Clone-base        | KNOWN ensembl   |
|                    | 1          | WDR65           | protein_coding       | HGNC (curated)    | KNOWN ensembl   |
| Putative ur        | 9          | C9orf56         | protein_coding       | HGNC (curated)    | KNOWN ensembl   |
|                    | 11         | AC103796        | pseudogene           | Clone-base        | NOVEL ensembl   |
| gap junction       | 1          | GJA4            | protein_coding       | HGNC (curated)    | KNOWN ensembl   |
|                    | 10         | RP11-298J       | processed_transcript | Clone-base        | PUTATIVE havana |
| unc-5 homolog      | 6          | UNC5CL          | protein_coding       | HGNC (auto)       | NOVEL ensembl   |
|                    | 2          | AC009299        | processed_transcript | Clone-base        | NOVEL havana    |
|                    | 3          | RP11-129B       | processed_transcript | Clone-base        | NOVEL havana    |
| ectonucleoside     | 10         | ENTPD7          | protein_coding       | HGNC (curated)    | KNOWN ensembl   |
|                    | 6          | POLH            | protein_coding       | HGNC (curated)    | KNOWN ensembl   |
|                    | 1          | AL355999        | lincRNA              | Clone-base        | KNOWN ensembl   |
|                    | 6          | AL445309        | lincRNA              | Clone-base        | KNOWN ensembl   |
| dynein, axon       | 5          | DNAH5           | protein_coding       | HGNC (curated)    | KNOWN ensembl   |
|                    | 12         | PRR4            | protein_coding       | HGNC (auto)       | KNOWN ensembl   |
|                    | 6          | AL590617        | lincRNA              | Clone-base        | KNOWN ensembl   |
| phosphatidyl       | 14         | PIGH            | protein_coding       | HGNC (auto)       | KNOWN ensembl   |
|                    | 13         | KCTD12          | protein_coding       | HGNC (curated)    | KNOWN ensembl   |
| potassium          | 1          | AL359752        | lincRNA              | Clone-base        | KNOWN ensembl   |
|                    | 1          | SCYL3           | protein_coding       | HGNC (curated)    | KNOWN ensembl   |
| SCY1-like 3        | 12         | KIF21A          | protein_coding       | HGNC (auto)       | KNOWN ensembl   |
| kinesin family     | 19         | TMEM146         | protein_coding       | HGNC (curated)    | KNOWN ensembl   |
| transmembrane      | 19         | AC008969        | protein_coding       | Clone-base        | KNOWN ensembl   |
| cDNA FLJ37         | 20         | SAMHD1          | protein_coding       | HGNC (curated)    | KNOWN ensembl   |
| SAM domain         | 17         | RP11-463N       | processed_transcript | Clone-base        | KNOWN havana    |
| secretory like     | 20         | SLPI            | protein_coding       | HGNC (curated)    | KNOWN ensembl   |
| ets homolog        | 11         | EHF             | protein_coding       | HGNC (auto)       | KNOWN ensembl   |

|               |               |            |            |       |         |
|---------------|---------------|------------|------------|-------|---------|
|               | 19 CTC-448F2. | pseudogen  | Clone-base | KNOWN | havana  |
|               | 7 CTB-54D4.   | pseudogen  | Clone-base | KNOWN | ensembl |
| mucin 15, c   | 11 MUC15      | protein_co | HGNC (aut  | KNOWN | ensembl |
|               | 21 AP000279.  | processed_ | Clone-base | NOVEL | havana  |
| cancer susc   | 10 CASC2      | processed_ | HGNC (cur  | KNOWN | ensembl |
| solute carri  | 7 SLC13A4     | protein_co | HGNC (cur  | KNOWN | ensembl |
| zinc finger,  | 2 ZRANB3      | protein_co | HGNC (cur  | KNOWN | ensembl |
| estrogen-re   | 1 ESRRG       | protein_co | HGNC (cur  | KNOWN | ensembl |
| Uncharacte    | 20 C20orf118  | protein_co | HGNC (cur  | KNOWN | ensembl |
| sperm asso    | 1 SPAG17      | protein_co | HGNC (cur  | KNOWN | ensembl |
| solute carri  | 5 SLC23A1     | protein_co | HGNC (cur  | KNOWN | ensembl |
| homeobox      | 17 HOXB2      | protein_co | HGNC (cur  | KNOWN | ensembl |
| solute carri  | 8 SLC7A2      | protein_co | HGNC (cur  | KNOWN | ensembl |
| epithelial c  | 6 ECT2L       | protein_co | HGNC (cur  | KNOWN | ensembl |
|               | 7 AC004945.   | processed_ | Clone-base | NOVEL | havana  |
| cerebral dc   | 10 CDNF       | protein_co | HGNC (cur  | KNOWN | ensembl |
| lymphocyte    | 2 LY75        | protein_co | HGNC (cur  | KNOWN | ensembl |
| death dom     | 4 DTHD1       | protein_co | HGNC (aut  | KNOWN | ensembl |
| GOLGA2L1      | 12 AC010203.  | protein_co | Clone-base | KNOWN | ensembl |
| taxilin gam X | CXorf15       | protein_co | HGNC (cur  | KNOWN | ensembl |
| zinc finger   | 19 ZNF808     | protein_co | HGNC (cur  | KNOWN | ensembl |
| ubiquitin-c   | 3 UBE2V1P2    | pseudogen  | HGNC (aut  | KNOWN | ensembl |
| MACRO do      | 20 MACROD2    | protein_co | HGNC (cur  | KNOWN | ensembl |
| collagen, ty  | 1 COL16A1     | protein_co | HGNC (cur  | KNOWN | ensembl |
|               | 11 AC112694.  | lincRNA    | Clone-base | KNOWN | ensembl |
| glycosylphc   | 6 GPLD1       | protein_co | HGNC (cur  | KNOWN | ensembl |
|               | 20 RP5-885L7. | processed_ | Clone-base | NOVEL | havana  |
| family with   | 15 FAM154B    | protein_co | HGNC (aut  | KNOWN | ensembl |
| transmemt     | 5 TMEM232     | protein_co | HGNC (cur  | KNOWN | ensembl |
| X             | AF011889.     | processed_ | Clone-base | NOVEL | havana  |
|               | 16 AC092145.  | lincRNA    | Clone-base | KNOWN | ensembl |
| centrosom     | 12 CEP290     | protein_co | HGNC (aut  | KNOWN | ensembl |
| cat eye syn   | 22 CECR1      | protein_co | HGNC (cur  | KNOWN | ensembl |
| serine carb   | 17 SCPEP1     | protein_co | HGNC (aut  | KNOWN | ensembl |

|              |    |           |                               |         |
|--------------|----|-----------|-------------------------------|---------|
| eukaryotic   | 1  | EEF1AL9   | pseudogen HGNC (cur: KNOWN    | havana  |
| neural retir | 14 | NRL       | protein_co HGNC (cur: KNOWN   | ensembl |
| Coiled-coil  | 6  | C6orf97   | protein_co HGNC (cur: KNOWN   | ensembl |
| leucine zip  | 1  | LZIC      | protein_co HGNC (cur: KNOWN   | ensembl |
| mutS homc    | 5  | MSH3      | protein_co HGNC (cur: KNOWN   | ensembl |
| doublecort   | 1  | DCDC2B    | protein_co HGNC (cur: KNOWN   | ensembl |
| kelch repe   | 13 | KBTBD7    | protein_co HGNC (cur: KNOWN   | ensembl |
| cell adhesi  | 3  | CHL1      | protein_co HGNC (cur: KNOWN   | ensembl |
|              | 9  | RP11-230L | processed_Clone-base NOVEL    | havana  |
| apolipopro   | 1  | APOBEC4   | protein_co HGNC (cur: KNOWN   | ensembl |
| EF-hand ca   | 1  | EFCAB2    | protein_co HGNC (cur: KNOWN   | ensembl |
| syntaxin bi  | 9  | STXBP1    | protein_co HGNC (cur: KNOWN   | ensembl |
| polymerase   | 20 | POLR3F    | protein_co HGNC (cur: KNOWN   | ensembl |
| Uncharacte   | 13 | C13orf30  | protein_co HGNC (cur: KNOWN   | ensembl |
| protease, s  | 16 | PRSS54    | protein_co HGNC (aut: KNOWN   | ensembl |
| cysteine ric | 2  | CRIM1     | protein_co HGNC (cur: KNOWN   | ensembl |
| solute carri | 15 | SLC27A2   | protein_co HGNC (cur: KNOWN   | ensembl |
|              |    | RP3-393P1 | pseudogen Clone-base KNOWN    | ensembl |
| cathepsin v  | 11 | CTSW      | protein_co HGNC (aut: KNOWN   | ensembl |
| complemer    | 9  | C5        | protein_co HGNC (cur: KNOWN   | ensembl |
| kinesin hea  | 5  | KIF2A     | protein_co HGNC (cur: KNOWN   | ensembl |
| HCG19922     | 11 | AC104942  | protein_co Clone-base KNOWN   | ensembl |
| dynein, axc  | 7  | DNAH11    | protein_co HGNC (cur: KNOWN   | ensembl |
| GTP-bindin   | 3  | GTPBP8    | protein_co HGNC (cur: KNOWN   | ensembl |
|              | 10 | RP11-539I | processed_Clone-base PUTATIVE | havana  |
| RNA, 28S ri  |    | RN28S1    | pseudogen HGNC (aut: KNOWN    | havana  |
| DnaJ (Hsp4   | 15 | DNAJA4    | protein_co HGNC (cur: KNOWN   | ensembl |
| tetraspanir  | 12 | TSPAN19   | protein_co HGNC (aut: KNOWN   | ensembl |
|              | 13 | RP11-149B | processed_Clone-base PUTATIVE | havana  |
| stromal ani  | 3  | STAG1     | protein_co HGNC (cur: KNOWN   | ensembl |
| retinoic aci | 3  | RARRES1   | protein_co HGNC (cur: KNOWN   | ensembl |
| zinc finger  | 5  | ZNF474    | protein_co HGNC (cur: KNOWN   | ensembl |
| BMP2 indu    | 4  | BMP2K     | protein_co HGNC (cur: KNOWN   | ensembl |
|              | 22 | XXbac-B56 | pseudogen Clone-base KNOWN    | ensembl |

|                     |    |            |                      |                |       |         |
|---------------------|----|------------|----------------------|----------------|-------|---------|
| galactokinase       | 15 | GALK2      | protein_coding       | HGNC (auto)    | KNOWN | ensembl |
|                     | 4  | RP11-10K1  | processed_transcript | Clone-base     | NOVEL | havana  |
|                     | 8  | AC025370   | lincRNA              | Clone-base     | KNOWN | ensembl |
| anillin, actin      | 7  | ANLN       | protein_coding       | HGNC (curator) | KNOWN | ensembl |
|                     | 7  | AC005062   | processed_transcript | Clone-base     | NOVEL | havana  |
| Putative ur         | 15 | AC091046   | protein_coding       | Clone-base     | KNOWN | ensembl |
| membrane            | 11 | MS4A8B     | protein_coding       | HGNC (auto)    | KNOWN | ensembl |
| Uncharacterized     | 17 | AC005726   | protein_coding       | Clone-base     | KNOWN | ensembl |
| Uncharacterized     | 2  | C2orf67    | protein_coding       | HGNC (curator) | KNOWN | ensembl |
| CD46 molecule       | 1  | CD46       | protein_coding       | HGNC (curator) | KNOWN | ensembl |
| EF-hand calcium     | 7  | EFCAB10    | protein_coding       | HGNC (curator) | KNOWN | ensembl |
| testis expressed    | 15 | TEX9       | protein_coding       | HGNC (curator) | KNOWN | ensembl |
| signal transduction | 2  | STAT1      | protein_coding       | HGNC (curator) | KNOWN | ensembl |
| antizyme inhibitor  | 8  | AZIN1      | protein_coding       | HGNC (auto)    | KNOWN | ensembl |
| heat shock          | 14 | HSP90AA1   | protein_coding       | HGNC (auto)    | KNOWN | ensembl |
| mutS homolog        | 2  | MSH6       | protein_coding       | HGNC (curator) | KNOWN | ensembl |
|                     | 11 | RP11-147I3 | pseudogene           | Clone-base     | KNOWN | havana  |
| doublecortin        | 11 | DCDC1      | protein_coding       | HGNC (curator) | KNOWN | ensembl |
| ankyrin 3, repeat   | 10 | ANK3       | protein_coding       | HGNC (curator) | KNOWN | ensembl |
| peptidylprolyl      | 6  | PPIL6      | protein_coding       | HGNC (curator) | KNOWN | ensembl |
| methyltransferase   | 12 | METTL7A    | protein_coding       | HGNC (auto)    | KNOWN | ensembl |
| chromodomain        | 17 | CHD3       | protein_coding       | HGNC (curator) | KNOWN | ensembl |
| KIAA1958 [          | 9  | KIAA1958   | protein_coding       | HGNC (curator) | KNOWN | ensembl |
| THO complex         | 22 | THOC5      | protein_coding       | HGNC (curator) | KNOWN | ensembl |
| v-akt murine        | 1  | AKT3       | protein_coding       | HGNC (curator) | KNOWN | ensembl |
| transmembrane       | 11 | TMEM223    | protein_coding       | HGNC (auto)    | KNOWN | ensembl |
| pancreatic          | 20 | PPDPF      | protein_coding       | HGNC (curator) | KNOWN | ensembl |
| mitochondrial       | 19 | MRPL54     | protein_coding       | HGNC (auto)    | KNOWN | ensembl |
| CTD (carboxyl)      | 2  | CTDSP1     | protein_coding       | HGNC (curator) | KNOWN | ensembl |
| diacylglycerol      | 7  | DAGLB      | protein_coding       | HGNC (curator) | KNOWN | ensembl |
| solute carrier      | 17 | SLC25A39   | protein_coding       | HGNC (curator) | KNOWN | ensembl |
| annexin A2          | 15 | ANXA2      | protein_coding       | HGNC (curator) | KNOWN | ensembl |
| cofilin 1 (nucleo)  | 11 | CFL1       | protein_coding       | HGNC (auto)    | KNOWN | ensembl |
| calpain, smooth     | 19 | CAPNS1     | protein_coding       | HGNC (auto)    | KNOWN | ensembl |

|               |    |           |                       |          |         |
|---------------|----|-----------|-----------------------|----------|---------|
| Rho GDP di    | 17 | ARHGDIA   | protein_co HGNC (auto | KNOWN    | ensembl |
| WAP four-c    | 20 | WFDC2     | protein_co HGNC (cur  | KNOWN    | ensembl |
| KIAA0415 [    | 7  | KIAA0415  | protein_co HGNC (auto | KNOWN    | ensembl |
| S100 calciu   | 1  | S100A6    | protein_co HGNC (cur  | KNOWN    | ensembl |
| S100 calciu   | 1  | S100A13   | protein_co HGNC (cur  | KNOWN    | ensembl |
| tumor sup     | 3  | TUSC2     | protein_co HGNC (cur  | KNOWN    | ensembl |
| cathepsin L   | 11 | CTSD      | protein_co HGNC (cur  | KNOWN    | ensembl |
| prenyl (dec   | 10 | PDSS1     | protein_co HGNC (cur  | KNOWN    | ensembl |
| lipolysis sti | 19 | LSR       | protein_co HGNC (auto | KNOWN    | ensembl |
| tetraspanin   | 7  | TSPAN13   | protein_co HGNC (cur  | KNOWN    | ensembl |
| AKT1 subst    | 19 | AKT1S1    | protein_co HGNC (cur  | KNOWN    | ensembl |
| deoxyhypu     | 19 | DOHH      | protein_co HGNC (auto | KNOWN    | ensembl |
| ATPase, H+    | 16 | ATP6V0C   | protein_co HGNC (cur  | KNOWN    | ensembl |
|               | 7  | AC007566  | processed_Clone-base  | PUTATIVE | havana  |
| enolase 1, l  | 1  | ENO1      | protein_co HGNC (cur  | KNOWN    | ensembl |
| ATPase, H+    | 1  | ATP6V0B   | protein_co HGNC (cur  | KNOWN    | ensembl |
| NADH dehy     | 19 | NDUFA3    | protein_co HGNC (cur  | KNOWN    | ensembl |
| Long palate   | 20 | C20orf114 | protein_co HGNC (cur  | KNOWN    | ensembl |
| capping pr    | 1  | CAPZB     | protein_co HGNC (cur  | KNOWN    | ensembl |
| endonucle     | 9  | ENDOG     | protein_co HGNC (cur  | KNOWN    | ensembl |
| MICAL-like    | 7  | MICALL2   | protein_co HGNC (cur  | KNOWN    | ensembl |
| polymerase    | 7  | POLR2J    | protein_co HGNC (cur  | KNOWN    | ensembl |
| THAP dom      | 1  | THAP3     | protein_co HGNC (cur  | KNOWN    | ensembl |
| SRY (sex de   | 17 | SOX15     | protein_co HGNC (auto | KNOWN    | ensembl |
| pseudourid    | 1  | PUSL1     | protein_co HGNC (cur  | KNOWN    | ensembl |
| Ras associa   | 11 | RASSF7    | protein_co HGNC (cur  | KNOWN    | ensembl |
| HLA class I   | 6  | HLA-A     | protein_co HGNC (cur  | KNOWN    | ensembl |
| G protein-c   | 12 | GPR81     | protein_co HGNC (auto | KNOWN    | ensembl |
| peptidylpr    | 15 | PPIB      | protein_co HGNC (cur  | KNOWN    | ensembl |
| synaptogyr    | 17 | SYNGR2    | protein_co HGNC (auto | KNOWN    | ensembl |
| triosephos    | 12 | TPI1      | protein_co HGNC (cur  | KNOWN    | ensembl |
| KDEL (Lys-/   | 19 | KDELRL1   | protein_co HGNC (auto | KNOWN    | ensembl |
|               | 4  | RP13-494C | processed_Clone-base  | NOVEL    | ensembl |
| glutathione   | 11 | GSTP1     | protein_co HGNC (cur  | KNOWN    | ensembl |

|              |              |            |            |          |         |
|--------------|--------------|------------|------------|----------|---------|
| granulin [Sc | 17 GRN       | protein_co | HGNC (auto | KNOWN    | ensembl |
|              | 6 RP11-98I9. | processed_ | Clone-base | PUTATIVE | havana  |
| dipeptidyl-l | 9 DPP7       | protein_co | HGNC (cur  | KNOWN    | ensembl |
|              | 17 AC124789. | processed_ | Clone-base | NOVEL    | havana  |
| Keratin, typ | 12 AC107016. | protein_co | Clone-base | KNOWN    | ensembl |
| ADP-ribosy   | 7 ARF5       | protein_co | HGNC (cur  | KNOWN    | ensembl |
| quiescin Q6  | 1 QSOX1      | protein_co | HGNC (cur  | KNOWN    | ensembl |
| uncoupling   | 11 UCP2      | protein_co | HGNC (auto | KNOWN    | ensembl |
| small nucle  | 16 SNRNP25   | protein_co | HGNC (cur  | KNOWN    | ensembl |
| Aminopept    | 9 C9orf3     | protein_co | HGNC (cur  | KNOWN    | ensembl |
| Uncharacte   | 14 C14orf178 | protein_co | HGNC (auto | KNOWN    | ensembl |
|              | 9 RP11-216B  | processed_ | Clone-base | NOVEL    | havana  |
| stromal cel  | 1 SDF4       | protein_co | HGNC (cur  | KNOWN    | ensembl |
|              | 7 RP5-894A1  | processed_ | Clone-base | PUTATIVE | havana  |
| aminoacyl t  | 7 AIMP2      | protein_co | HGNC (cur  | KNOWN    | ensembl |
| aspartate b  | 22 ASPHD2    | protein_co | HGNC (cur  | KNOWN    | ensembl |
| tumor-assc   | 1 TACSTD2    | protein_co | HGNC (cur  | KNOWN    | ensembl |
| aurora kina  | 1 AURKAIP1   | protein_co | HGNC (cur  | KNOWN    | ensembl |
| TCF3 (E2A)   | 19 TFPT      | protein_co | HGNC (cur  | KNOWN    | ensembl |
| coiled-coil  | 3 CCDC12     | protein_co | HGNC (cur  | KNOWN    | ensembl |
| proline rich | 7 PRR15      | protein_co | HGNC (cur  | KNOWN    | ensembl |
| NOP16 nuc    | 5 NOP16      | protein_co | HGNC (cur  | KNOWN    | ensembl |
| serine pept  | 15 SPINT1    | protein_co | HGNC (cur  | KNOWN    | ensembl |
| mitochond    | 6 MRPS18A    | protein_co | HGNC (cur  | KNOWN    | ensembl |
| solute carri | 4 SLC26A1    | protein_co | HGNC (cur  | KNOWN    | ensembl |
| prefoldin si | 5 PFDN1      | protein_co | HGNC (cur  | KNOWN    | ensembl |
| guanylate k  | 1 GUK1       | protein_co | HGNC (cur  | KNOWN    | ensembl |
| Uncharacte   | 11 C11orf35  | protein_co | HGNC (cur  | KNOWN    | ensembl |
| transmembr   | 10 TMEM180   | protein_co | HGNC (cur  | KNOWN    | ensembl |
| F-box and \  | 9 FBXW5      | protein_co | HGNC (cur  | KNOWN    | ensembl |
| RAB15, me    | 14 RAB15     | protein_co | HGNC (cur  | KNOWN    | ensembl |
| Zinc transp  | 6 SLC39A7    | protein_co | HGNC (cur  | KNOWN    | ensembl |
|              | 1 CTA-55I10. | processed_ | Clone-base | NOVEL    | havana  |
| synaptotag   | 1 SYTL1      | protein_co | HGNC (cur  | KNOWN    | ensembl |

|              |              |                                |         |
|--------------|--------------|--------------------------------|---------|
| leukocyte r  | 19 LENG9     | protein_co HGNC (cur: KNOWN    | ensembl |
| UPF0539 p    | 7 C7orf59    | protein_co HGNC (cur: KNOWN    | ensembl |
| deltex hom   | 7 DTX2       | protein_co HGNC (cur: KNOWN    | ensembl |
| BCL2-assoc   | 9 BAG1       | protein_co HGNC (cur: KNOWN    | ensembl |
| oligosaccha  | 2 OST4       | processed_ HGNC (aut: NOVEL    | ensembl |
| tetraspanir  | 12 TSPAN8    | protein_co HGNC (aut: KNOWN    | ensembl |
|              | 9 RP11-426A  | processed_ Clone-base NOVEL    | havana  |
|              | 19 AC012318. | pseudogen Clone-base NOVEL     | ensembl |
| phosphatid   | 8 PPAPDC1B   | protein_co HGNC (aut: KNOWN    | ensembl |
| tapasin isol | 6 TAPBP      | protein_co HGNC (cur: KNOWN    | ensembl |
| Rab accept   | 19 RABAC1    | protein_co HGNC (aut: KNOWN    | ensembl |
| split hand/i | 7 SHFM1      | protein_co HGNC (cur: KNOWN    | ensembl |
|              | 1 RP11-99J1  | processed_ Clone-base PUTATIVE | havana  |
| DNA-direct   | 6 ZNRD1      | protein_co HGNC (cur: KNOWN    | ensembl |
| retinol deh  | 8 RDH10      | protein_co HGNC (aut: KNOWN    | ensembl |
| nuclear prc  | 16 NUPR1     | protein_co HGNC (cur: KNOWN    | ensembl |
| major histc  | 6 HLA-H      | pseudogen HGNC (cur: KNOWN     | ensembl |
| Immortaliz   | 19 C19orf33  | protein_co HGNC (aut: KNOWN    | ensembl |
| leucine rich | 3 LRRFIP2    | protein_co HGNC (cur: KNOWN    | ensembl |
| heme bindi   | 6 HEBP2      | protein_co HGNC (cur: KNOWN    | ensembl |
|              | 2 AC008280.  | processed_ Clone-base NOVEL    | havana  |
| dehydroge    | 1 DHRS3      | protein_co HGNC (cur: KNOWN    | ensembl |
| H1 histone   | 3 H1FX       | protein_co HGNC (cur: KNOWN    | ensembl |
| v-raf murinX | ARAF         | protein_co HGNC (cur: KNOWN    | ensembl |
| ArfGAP wit   | 1 ACAP3      | protein_co HGNC (cur: KNOWN    | ensembl |
| glyceraldeh  | 12 GAPDH     | protein_co HGNC (cur: KNOWN    | ensembl |
| CD68 mole    | 17 CD68      | protein_co HGNC (cur: KNOWN    | ensembl |
| hematologi   | 17 HN1       | protein_co HGNC (cur: KNOWN    | ensembl |
| sequestosc   | 5 SQSTM1     | protein_co HGNC (cur: KNOWN    | ensembl |
| peroxiredo   | 1 PRDX1      | protein_co HGNC (cur: KNOWN    | ensembl |
| FK506 bind   | 12 FKBP11    | protein_co HGNC (aut: KNOWN    | ensembl |
| translocaseX | TIMM17B      | protein_co HGNC (cur: KNOWN    | ensembl |
| polymerase   | 11 POLD4     | protein_co HGNC (aut: KNOWN    | ensembl |
| Putative ur  | 3 RP11-159G  | protein_co Clone-base NOVEL    | ensembl |

|                |             |                             |         |
|----------------|-------------|-----------------------------|---------|
| MAX dimer      | 5 MXD3      | protein_co HGNC (cur; KNOWN | ensembl |
| patatin-like   | 11 PNPLA2   | protein_co HGNC (cur; KNOWN | ensembl |
| target of m    | 22 TOM1     | protein_co HGNC (cur; KNOWN | ensembl |
| cortixin 1     | 19 CTXN1    | protein_co HGNC (aut; KNOWN | ensembl |
| mannosyl (     | 5 MGAT4B    | protein_co HGNC (cur; KNOWN | ensembl |
| EF-hand ca     | 11 EFCAB4A  | protein_co HGNC (aut; KNOWN | ensembl |
| arginyl ami    | 2 RNPEPL1   | protein_co HGNC (cur; KNOWN | ensembl |
| ATG4 auto      | 2 ATG4B     | protein_co HGNC (cur; KNOWN | ensembl |
| insulin-like   | 7 IGFBP3    | protein_co HGNC (cur; KNOWN | ensembl |
| glutathione    | 3 GPX1      | protein_co HGNC (cur; KNOWN | ensembl |
| Rho guanine    | 1 ARHGEF10  | protein_co HGNC (cur; KNOWN | ensembl |
| 1-acylglyce    | 6 AGPAT4    | protein_co HGNC (cur; KNOWN | ensembl |
|                | 6 DAQB-335/ | processed_Clone-base KNOWN  | havana  |
| ubiquinol-c    | 5 UQCRQ     | protein_co HGNC (cur; KNOWN | ensembl |
| G patch do     | 1 GPATCH3   | protein_co HGNC (cur; KNOWN | ensembl |
| keratin 8 [S   | 12 KRT8     | protein_co HGNC (aut; KNOWN | ensembl |
| family with    | 16 FAM173A  | protein_co HGNC (cur; KNOWN | ensembl |
| CD63 mole      | 12 CD63     | protein_co HGNC (aut; KNOWN | ensembl |
| tissue spec    | 8 TSTA3     | protein_co HGNC (aut; KNOWN | ensembl |
| NADH dehy      | 5 NDUFS6    | protein_co HGNC (cur; KNOWN | ensembl |
| carnitine O    | 9 CRAT      | protein_co HGNC (cur; KNOWN | ensembl |
| CD52 mole      | 1 CD52      | protein_co HGNC (cur; KNOWN | ensembl |
| inhibitor of X | IKBKG       | protein_co HGNC (cur; KNOWN | ensembl |
| major facili   | 4 MFSD7     | protein_co HGNC (cur; KNOWN | ensembl |
|                | 4 RP11-293A | processed_Clone-base NOVEL  | havana  |
| GABA(A) re     | 12 GABARAPL | protein_co HGNC (aut; KNOWN | ensembl |
| thymosin b     | 2 TMSB10    | protein_co HGNC (cur; KNOWN | ensembl |
|                | 1 RP11-466F | pseudogen Clone-base KNOWN  | havana  |
| EPH recept     | 7 EPHA1     | protein_co HGNC (cur; KNOWN | ensembl |
|                | 9 RP11-382H | pseudogen Clone-base KNOWN  | ensembl |
| thymosin-liX   | TMSB4X      | protein_co HGNC (cur; KNOWN | ensembl |
| serine inco    | 1 SERINC2   | protein_co HGNC (cur; KNOWN | ensembl |
| transcriptic   | 1 TCEA3     | protein_co HGNC (cur; KNOWN | ensembl |
| ring finger    | 6 RNF39     | protein_co HGNC (cur; KNOWN | ensembl |



|               |              |                                |         |
|---------------|--------------|--------------------------------|---------|
| calpain 9 [S  | 1 CAPN9      | protein_co HGNC (cur; KNOWN    | ensembl |
| clathrin, lig | 5 CLTB       | protein_co HGNC (cur; KNOWN    | ensembl |
| leukotriene   | 5 LTC4S      | protein_co HGNC (cur; KNOWN    | ensembl |
|               | 5 CTB-3601.  | pseudogen Clone-base KNOWN     | havana  |
| Uncharacte    | 17 C17orf107 | protein_co HGNC (aut; KNOWN    | ensembl |
| transmembr    | 15 TMED3     | protein_co HGNC (cur; KNOWN    | ensembl |
|               | 17 AC011933. | pseudogen Clone-base KNOWN     | havana  |
| translocato   | 22 TSPO      | protein_co HGNC (cur; KNOWN    | ensembl |
| ferritin, he  | 5 FTHL10     | processed_ HGNC (cur; KNOWN    | ensembl |
| anterior gr   | 7 AGR2       | protein_co HGNC (cur; KNOWN    | ensembl |
| RAB24, me     | 5 RAB24      | protein_co HGNC (cur; KNOWN    | ensembl |
| UDP-galact    | 1 GALE       | protein_co HGNC (cur; KNOWN    | ensembl |
| ferritin, he  | 2 FTHL20     | pseudogen HGNC (cur; KNOWN     | havana  |
| stratifin [S  | 1 SFN        | protein_co HGNC (cur; KNOWN    | ensembl |
| prominin 2    | 2 PROM2      | protein_co HGNC (cur; KNOWN    | ensembl |
| syndecan 1    | 2 SDC1       | protein_co HGNC (cur; KNOWN    | ensembl |
|               | 21 AP000318. | processed_ Clone-base NOVEL    | havana  |
| cornichon l   | 11 CNIH2     | protein_co HGNC (aut; KNOWN    | ensembl |
| annexin A3    | 4 ANXA3      | protein_co HGNC (cur; KNOWN    | ensembl |
| islet cell au | 7 ICA1       | protein_co HGNC (cur; KNOWN    | ensembl |
|               | 6 RP11-425D  | pseudogen Clone-base KNOWN     | ensembl |
| S100 calciu   | 1 S100A14    | protein_co HGNC (cur; KNOWN    | ensembl |
|               | 5 CTD-2061E  | processed_ Clone-base PUTATIVE | havana  |
| neural prol   | 9 NPDC1      | protein_co HGNC (cur; KNOWN    | ensembl |
| S100 calciu   | 1 S100A16    | protein_co HGNC (cur; KNOWN    | ensembl |
|               | 4 RP11-264J  | processed_ Clone-base NOVEL    | havana  |
|               | 1 RP5-884G6  | processed_ Clone-base NOVEL    | havana  |
| heat shock    | 7 HSPB1      | protein_co HGNC (cur; KNOWN    | ensembl |
|               | 12 U47924.8  | processed_ Clone-base NOVEL    | havana  |
| trefoil fact  | 21 TFF3      | protein_co HGNC (cur; KNOWN    | ensembl |
| NK3 homeo     | 8 NKX3-1     | protein_co HGNC (cur; KNOWN    | ensembl |
| alpha-2-gly   | 7 AZGP1      | protein_co HGNC (cur; KNOWN    | ensembl |
| family with   | 21 FAM3B     | protein_co HGNC (cur; KNOWN    | ensembl |
| calpain 8 [S  | 1 CAPN8      | protein_co HGNC (cur; KNOWN    | ensembl |

|              |             |                             |         |
|--------------|-------------|-----------------------------|---------|
| TIMP meta X  | TIMP1       | protein_co HGNC (cur; KNOWN | ensembl |
| HLA class II | 6 HLA-DQB1  | protein_co HGNC (cur; KNOWN | ensembl |
|              | 1 RP11-206L | pseudogen Clone-base KNOWN  | ensembl |
| similar to h | 2 AC110619. | protein_co Clone-base NOVEL | ensembl |
| V-set and ir | 11 VSIG2    | protein_co HGNC (cur; KNOWN | ensembl |
| CDC42 effe   | 19 CDC42EP5 | protein_co HGNC (cur; KNOWN | ensembl |
| S100 calciu  | 4 S100P     | protein_co HGNC (cur; KNOWN | ensembl |
| S100 calciu  | 1 S100A9    | protein_co HGNC (cur; KNOWN | ensembl |
| brain and a  | 8 BAALC     | protein_co HGNC (aut; KNOWN | ensembl |
| cystatin A ( | 3 CSTA      | protein_co HGNC (cur; KNOWN | ensembl |
| 5-hydroxyt   | 2 HTR2B     | protein_co HGNC (cur; KNOWN | ensembl |
|              | 2 AC008268. | processed_ Clone-base NOVEL | havana  |
| keratin 13   | 17 KRT13    | protein_co HGNC (cur; KNOWN | ensembl |
| ribosomal pY | RPS4Y1      | protein_co HGNC (cur; KNOWN | ensembl |
| threonine s  | 2 THNSL2    | protein_co HGNC (cur; KNOWN | ensembl |
| proline-rich | 12 PRB4     | protein_co HGNC (aut; KNOWN | ensembl |
| secretoglot  | 11 SCGB1A1  | protein_co HGNC (aut; KNOWN | ensembl |
| nitric oxide | 17 NOS2     | protein_co HGNC (cur; KNOWN | ensembl |
| mucin 5B, c  | 11 MUC5B    | protein_co HGNC (aut; KNOWN | ensembl |
| cytochrom    | 19 CYP2A13  | protein_co HGNC (aut; KNOWN | ensembl |
| complemer    | 19 C3       | protein_co HGNC (cur; KNOWN | ensembl |
| catenin (ca  | 9 CTNNAL1   | protein_co HGNC (cur; KNOWN | ensembl |
| secretoglot  | 5 SCGB3A1   | protein_co HGNC (cur; KNOWN | ensembl |
| matrix met   | 11 MMP10    | protein_co HGNC (aut; KNOWN | ensembl |
| calpain 13   | 2 CAPN13    | protein_co HGNC (cur; KNOWN | ensembl |
| NEL-like 2 ( | 12 NELL2    | protein_co HGNC (aut; KNOWN | ensembl |
| Uncharacte   | 13 C13orf26 | protein_co HGNC (cur; KNOWN | ensembl |
| vitelline m  | 17 VMO1     | protein_co HGNC (aut; KNOWN | ensembl |
| protein S (  | 3 PROS1     | protein_co HGNC (cur; KNOWN | ensembl |
| solute carri | 20 SLC13A3  | protein_co HGNC (cur; KNOWN | ensembl |
| UDP glucur   | 4 UGT2A1    | protein_co HGNC (cur; KNOWN | ensembl |
| serum amy    | 11 SAA1     | protein_co HGNC (aut; KNOWN | ensembl |
| chemokine    | 4 CXCL1     | protein_co HGNC (cur; KNOWN | ensembl |
| oxysterol b  | 2 OSBPL6    | protein_co HGNC (cur; KNOWN | ensembl |

|               |              |            |              |       |         |
|---------------|--------------|------------|--------------|-------|---------|
| chemokine     | 4 CXCL6      | protein_co | HGNC (curat) | KNOWN | ensembl |
| Fc fragmen    | 19 FCGBP     | protein_co | HGNC (auto)  | KNOWN | ensembl |
| solute carri  | 12 SLC5A8    | protein_co | HGNC (auto)  | KNOWN | ensembl |
| Uncharacte    | 16 C16orf89  | protein_co | HGNC (curat) | KNOWN | ensembl |
| Uncharacte    | 1 C1orf141   | protein_co | HGNC (curat) | KNOWN | ensembl |
| ATP-bindin    | 7 ABCA13     | protein_co | HGNC (curat) | KNOWN | ensembl |
| interferon-   | 10 IFIT1     | protein_co | HGNC (curat) | KNOWN | ensembl |
| cytochrom     | 19 CYP2F1    | protein_co | HGNC (auto)  | KNOWN | ensembl |
| STEAP fami    | 7 STEAP4     | protein_co | HGNC (curat) | KNOWN | ensembl |
|               | 3 AC104307.  | lincRNA    | Clone-base   | KNOWN | ensembl |
|               | 11 AP002451. | lincRNA    | Clone-base   | NOVEL | ensembl |
| coiled-coil   | 11 CCDC81    | protein_co | HGNC (auto)  | KNOWN | ensembl |
| serum amy     | 11 SAA2      | protein_co | HGNC (auto)  | KNOWN | ensembl |
|               | 13 RP11-305D | pseudogen  | Clone-base   | KNOWN | ensembl |
| Uncharacte    | 1 C1orf168   | protein_co | HGNC (curat) | KNOWN | ensembl |
| hydroxyste    | 4 HSD17B13   | protein_co | HGNC (curat) | KNOWN | ensembl |
| keratin 8 p   | 3 KRT8P12    | processed_ | HGNC (curat) | KNOWN | havana  |
| arachidona    | 17 ALOX15    | protein_co | HGNC (curat) | KNOWN | ensembl |
| myoglobin     | 22 MB        | protein_co | HGNC (curat) | KNOWN | ensembl |
| Augurin Pre   | 2 C2orf40    | protein_co | HGNC (curat) | KNOWN | ensembl |
| neurotensi    | 12 NTS       | protein_co | HGNC (auto)  | KNOWN | ensembl |
| vanin 3 [So   | 6 VNN3       | processed_ | HGNC (curat) | KNOWN | ensembl |
| ATPase typ    | 3 ATP13A3    | protein_co | HGNC (curat) | KNOWN | ensembl |
| pleckstrin f  | 12 PLEKHG7   | protein_co | HGNC (auto)  | KNOWN | ensembl |
| crystallin, n | 16 CRYM      | protein_co | HGNC (curat) | KNOWN | ensembl |
| cytochrom     | 1 CYP4B1     | protein_co | HGNC (curat) | KNOWN | ensembl |
| extracellul   | 9 ECM2       | protein_co | HGNC (curat) | KNOWN | ensembl |
| transmembr    | 2 TMEM194f   | protein_co | HGNC (curat) | KNOWN | ensembl |
| ATPase, H+    | 13 ATP12A    | protein_co | HGNC (curat) | KNOWN | ensembl |
| six transme   | 7 STEAP1     | protein_co | HGNC (curat) | KNOWN | ensembl |
| pumilio ho    | 2 PUM2       | protein_co | HGNC (curat) | KNOWN | ensembl |
| dpy-19-like   | 7 DPY19L2P4  | processed_ | HGNC (curat) | KNOWN | havana  |
| kelch repe    | 2 KBTBD10    | protein_co | HGNC (curat) | KNOWN | ensembl |
| sentan, cili  | 3 SNTN       | protein_co | HGNC (curat) | KNOWN | ensembl |

|              |              |                               |         |
|--------------|--------------|-------------------------------|---------|
| nuclear tra  | 6 NFYA       | protein_co HGNC (cur; KNOWN   | ensembl |
| Uncharacte   | 1 C1orf87    | protein_co HGNC (cur; KNOWN   | ensembl |
| UPF0407 p    | 2 C2orf39    | protein_co HGNC (cur; KNOWN   | ensembl |
| superoxide   | 6 SOD2       | protein_co HGNC (cur; KNOWN   | ensembl |
| LIM domain   | 1 LMO4       | protein_co HGNC (cur; KNOWN   | ensembl |
| aldehyde d   | 15 ALDH1A3   | protein_co HGNC (cur; KNOWN   | ensembl |
| prolyl 4-hy  | 17 P4HB      | protein_co HGNC (cur; KNOWN   | ensembl |
| ATPase, H+   | 16 ATP6V0D1  | protein_co HGNC (cur; KNOWN   | ensembl |
| CD151 mol    | 11 CD151     | protein_co HGNC (cur; KNOWN   | ensembl |
|              | 9 RP11-203J2 | processed_clone-base PUTATIVE | havana  |
| solute carri | 1 SLC2A1     | protein_co HGNC (cur; KNOWN   | ensembl |
| suppressio   | 11 ST14      | protein_co HGNC (aut; KNOWN   | ensembl |
| alcohol de   | 4 ADH7       | protein_co HGNC (cur; KNOWN   | ensembl |
|              | 8 AC023644   | pseudogen Clone-base NOVEL    | ensembl |
|              | 1 RP4-646B1  | pseudogen Clone-base KNOWN    | havana  |
| aldolase A,  | 16 ALDOA     | protein_co HGNC (cur; KNOWN   | ensembl |
|              | 1 AL390718   | lincRNA Clone-base KNOWN      | ensembl |
| EPS8-like 1  | 19 EPS8L1    | protein_co HGNC (aut; KNOWN   | ensembl |
| cAMP resp    | 11 CREB3L1   | protein_co HGNC (aut; KNOWN   | ensembl |
| glutathione  | 8 GSR        | protein_co HGNC (aut; KNOWN   | ensembl |
| X            | L29074.1     | pseudogen Clone-base KNOWN    | havana  |
| deoxyribon   | 16 DNASE1    | protein_co HGNC (cur; KNOWN   | ensembl |
| EF-hand do   | 1 EFHD2      | protein_co HGNC (cur; KNOWN   | ensembl |
| troponin T   | 11 TNNT3     | protein_co HGNC (cur; KNOWN   | ensembl |
| transaldola  | 11 TALDO1    | protein_co HGNC (cur; KNOWN   | ensembl |
| HIV-1 Tat ir | 11 HTATIP2   | protein_co HGNC (aut; KNOWN   | ensembl |
| phosphogl    | 1 PGD        | protein_co HGNC (cur; KNOWN   | ensembl |
| Uncharacte   | 15 C15orf34  | protein_co HGNC (aut; KNOWN   | ensembl |
| solute carri | 11 SLC3A2    | protein_co HGNC (cur; KNOWN   | ensembl |
| lysophosph   | 15 LPCAT4    | protein_co HGNC (aut; KNOWN   | ensembl |
| fucosyltran  | 19 FUT3      | protein_co HGNC (aut; KNOWN   | ensembl |
| bactericida  | 20 BPIL1     | protein_co HGNC (cur; KNOWN   | ensembl |
| S100 calciu  | 1 S100A10    | protein_co HGNC (cur; KNOWN   | ensembl |
| NAD(P)H de   | 16 NQO1      | protein_co HGNC (cur; KNOWN   | ensembl |

|               |              |                       |         |
|---------------|--------------|-----------------------|---------|
| sushi-repea   | SRPX2        | protein_co HGNC (cur  | ensembl |
| glucose-6-ph  | G6PD         | protein_co HGNC (cur  | ensembl |
| thioredoxin   | 9 TXN        | protein_co HGNC (cur  | ensembl |
| transketola   | 3 TKT        | protein_co HGNC (cur  | ensembl |
| ferritin, lig | 20 FTLP3     | pseudogen HGNC (aut   | havana  |
| mesothelin    | 16 MSLN      | protein_co HGNC (cur  | ensembl |
| ferritin, lig | 19 FTL       | protein_co HGNC (aut  | ensembl |
| GDP-mann      | 6 GMDS       | protein_co HGNC (cur  | ensembl |
| SAM point     | 6 SPDEF      | protein_co HGNC (cur  | ensembl |
| cyclin-depe   | 9 CDKN2A     | protein_co HGNC (cur  | ensembl |
|               | 6 RP1-27K12  | processed_Clone-base  | havana  |
| ubiquitin c   | 4 UCHL1      | protein_co HGNC (cur  | ensembl |
| H19, imprir   | 11 H19       | processed_HGNC (cur   | havana  |
| aldo-keto r   | 10 AKR1C1    | protein_co HGNC (cur  | ensembl |
| aldo-keto r   | 10 AKR1C2    | protein_co HGNC (cur  | ensembl |
| glutathione   | 14 GPX2      | protein_co HGNC (aut  | ensembl |
| mucin 2, ol   | 11 MUC2      | protein_co HGNC (cur  | ensembl |
| aldehyde d    | 17 ALDH3A1   | protein_co HGNC (cur  | ensembl |
| transcobal    | 11 TCN1      | protein_co HGNC (aut  | ensembl |
| aldo-keto r   | 7 AKR1B10    | protein_co HGNC (cur  | ensembl |
| cytochrom     | 15 CYP1A1    | protein_co HGNC (cur  | ensembl |
| Zinc finger   | 19 AC006116. | protein_co Clone-base | ensembl |
| glycine cle   | 2 AC007383.  | processed_Clone-base  | havana  |
|               | 20 RP5-1041C | pseudogen Clone-base  | havana  |
| leucine rich  | 5 LRRC70     | protein_co HGNC (cur  | ensembl |
|               | 6 AL353588.  | processed_Clone-base  | ensembl |
|               | 20 AL034548. | lincRNA Clone-base    | ensembl |
| CMP-N-ace     | 5 AC010411.  | protein_co Clone-base | ensembl |
| Putative ur   | 7 AC124781.  | protein_co Clone-base | ensembl |
|               | 16 AC010333. | lincRNA Clone-base    | ensembl |
|               | 3 AC024937.  | processed_Clone-base  | ensembl |
| Putative ur   | 2 AC079807.  | protein_co Clone-base | ensembl |
|               | 13 RP11-480P | pseudogen Clone-base  | havana  |
| ribosomal p   | 20 RPS10P2   | pseudogen HGNC (cur   | havana  |

|                                                                                 |                 |                      |                |          |         |
|---------------------------------------------------------------------------------|-----------------|----------------------|----------------|----------|---------|
| Uncharacterized<br>heat shock                                                   | 10 C10orf111    | protein_coding       | HGNC (curated) | KNOWN    | ensembl |
|                                                                                 | 14 HSPA2        | protein_coding       | HGNC (curated) | KNOWN    | ensembl |
|                                                                                 | 1 AL356356.1    | lincRNA              | Clone-base     | KNOWN    | ensembl |
|                                                                                 | 13 AL354696.4   | lincRNA              | Clone-base     | NOVEL    | ensembl |
| cDNA FLJ40131<br>GRAM domain                                                    | 11 AC103681.1   | protein_coding       | Clone-base     | KNOWN    | ensembl |
|                                                                                 | 19 GRAMD1A      | protein_coding       | HGNC (auto)    | KNOWN    | ensembl |
|                                                                                 | 8 RP11-303G2.2  | pseudogen            | Clone-base     | KNOWN    | havana  |
| Uncharacterized<br>cDNA FLJ40131                                                | 14 C14orf50     | protein_coding       | HGNC (curated) | KNOWN    | ensembl |
|                                                                                 | 21 AP001468.1   | protein_coding       | Clone-base     | KNOWN    | ensembl |
|                                                                                 | 9 RP11-287A2.1  | pseudogen            | Clone-base     | KNOWN    | havana  |
|                                                                                 | 7 AC005522.1    | pseudogen            | Clone-base     | KNOWN    | havana  |
|                                                                                 | 11 AC103681.1   | lincRNA              | Clone-base     | NOVEL    | ensembl |
|                                                                                 | 2 AC017074.1    | lincRNA              | Clone-base     | KNOWN    | ensembl |
| Tyrosine-protein<br>family with                                                 | 8 AC046176.1    | protein_coding       | Clone-base     | KNOWN    | ensembl |
|                                                                                 | 5 CTD-2331H1.1  | pseudogen            | Clone-base     | KNOWN    | havana  |
|                                                                                 | 9 FAM122A       | protein_coding       | HGNC (curated) | KNOWN    | ensembl |
| zinc finger  <br>WD repeat                                                      | 1 RP11-67L3.1   | processed_transcript | Clone-base     | NOVEL    | havana  |
|                                                                                 | 20 RP4-785G1.1  | pseudogen            | Clone-base     | KNOWN    | havana  |
|                                                                                 | 7 ZNF713        | protein_coding       | HGNC (curated) | KNOWN    | ensembl |
|                                                                                 | 4 AC104082.1    | protein_coding       | Clone-base     | KNOWN    | ensembl |
| pogo transposon                                                                 | 10 RP11-388P1.1 | processed_transcript | Clone-base     | PUTATIVE | havana  |
|                                                                                 | 1 AL589764.1    | protein_coding       | Clone-base     | KNOWN    | ensembl |
|                                                                                 | 1 AL512503.1    | rRNA_pseudogen       | Clone-base     | NOVEL    | ensembl |
|                                                                                 | 12 AC112777.1   | rRNA_pseudogen       | Clone-base     | NOVEL    | ensembl |
|                                                                                 | 5 RP11-528L1.1  | processed_transcript | Clone-base     | PUTATIVE | havana  |
| metallothionein<br>THAP domain<br>laminin subunit<br>sec1 family<br>RNA binding | 16 MT1F         | protein_coding       | HGNC (auto)    | KNOWN    | ensembl |
|                                                                                 | 7 THAP5         | protein_coding       | HGNC (curated) | KNOWN    | ensembl |
|                                                                                 | 1 AL354953.1    | protein_coding       | Clone-base     | KNOWN    | ensembl |
|                                                                                 | 14 AL121852.1   | protein_coding       | Clone-base     | KNOWN    | ensembl |
|                                                                                 | 1 RBMXL1        | protein_coding       | HGNC (curated) | KNOWN    | ensembl |
| Putative uracil<br>S-phase response                                             | 3 AC126118.1    | pseudogen            | Clone-base     | KNOWN    | havana  |
|                                                                                 | 2 AC007385.1    | protein_coding       | Clone-base     | KNOWN    | ensembl |
|                                                                                 | 1 SPHAR         | protein_coding       | HGNC (curated) | KNOWN    | ensembl |
|                                                                                 | 17 AC003043.1   | processed_transcript | Clone-base     | NOVEL    | havana  |

|                                        |    |           |            |            |          |         |
|----------------------------------------|----|-----------|------------|------------|----------|---------|
| Putative ur                            | 7  | AC004951. | pseudogen  | Clone-base | KNOWN    | havana  |
|                                        | 1  | AL355149. | protein_co | Clone-base | KNOWN    | ensembl |
|                                        | 3  | AC002481. | processed_ | Clone-base | PUTATIVE | havana  |
|                                        | 7  | AC079742. | processed_ | Clone-base | PUTATIVE | havana  |
|                                        | 1  | RP5-1024G | processed_ | Clone-base | PUTATIVE | havana  |
| BAG family                             | 12 | AC107016. | pseudogen  | Clone-base | NOVEL    | ensembl |
|                                        | 5  | AC008427. | lincRNA    | Clone-base | NOVEL    | ensembl |
|                                        | 7  | AC004967. | pseudogen  | Clone-base | KNOWN    | havana  |
|                                        | 9  | AL161445. | protein_co | Clone-base | KNOWN    | ensembl |
|                                        |    | RP13-138P | pseudogen  | Clone-base | KNOWN    | ensembl |
| Uncharacte                             | 19 | C19orf28  | protein_co | HGNC (aut  | KNOWN    | ensembl |
|                                        | 6  | RP3-330M  | processed_ | Clone-base | NOVEL    | havana  |
|                                        | 18 | AC069356. | protein_co | Clone-base | KNOWN    | ensembl |
|                                        | 5  | AC005618. | lincRNA    | Clone-base | NOVEL    | ensembl |
|                                        | 5  | PCDHGC5   | protein_co | HGNC (cur  | KNOWN    | ensembl |
| protocadhe<br>angiogenin<br>lymphocyte | 14 | ANG       | protein_co | HGNC (cur  | KNOWN    | ensembl |
|                                        | 8  | LY6E      | protein_co | HGNC (aut  | KNOWN    | ensembl |
|                                        | 1  | RP5-1061H | pseudogen  | Clone-base | KNOWN    | havana  |
|                                        | 16 | BOLA2     | protein_co | HGNC (aut  | KNOWN    | ensembl |
|                                        | 1  | RP5-857K2 | pseudogen  | Clone-base | KNOWN    | havana  |
| bolA homo                              | 5  | RP11-423H | processed_ | Clone-base | NOVEL    | havana  |
|                                        | 15 | AC013356. | protein_co | Clone-base | KNOWN    | ensembl |
|                                        | 7  | UPK3B     | protein_co | HGNC (cur  | KNOWN    | ensembl |
|                                        | 8  | AC113188. | processed_ | Clone-base | KNOWN    | havana  |
|                                        | 16 | GIYD1     | protein_co | HGNC (cur  | KNOWN    | ensembl |
| Cell growth<br>urolakin 3              | 5  | RP11-278J | pseudogen  | Clone-base | KNOWN    | ensembl |
|                                        | 6  | AL031963. | lincRNA    | Clone-base | NOVEL    | ensembl |
|                                        | 9  | RP11-112J | processed_ | Clone-base | PUTATIVE | havana  |
|                                        | 17 | TRIM16L   | protein_co | HGNC (cur  | KNOWN    | ensembl |
|                                        | 15 | CTD-2017F | protein_co | Clone-base | NOVEL    | havana  |
| GIY-YIG doi                            | 3  | RP11-468F | pseudogen  | Clone-base | KNOWN    | havana  |
|                                        | 1  | RP11-134G | processed_ | Clone-base | NOVEL    | havana  |
|                                        | 17 | AC026271. | processed_ | Clone-base | NOVEL    | havana  |
|                                        | 2  | AC068134. | pseudogen  | Clone-base | KNOWN    | havana  |
|                                        |    |           |            |            |          |         |
| tripartite n<br>Putative ur            |    |           |            |            |          |         |
|                                        |    |           |            |            |          |         |
|                                        |    |           |            |            |          |         |
|                                        |    |           |            |            |          |         |
|                                        |    |           |            |            |          |         |

|             |              |                             |         |
|-------------|--------------|-----------------------------|---------|
| prostate cc | 13 RP11-45B2 | processed_ Clone-base NOVEL | ensembl |
| UDP glucur  | 2 UGT1A7     | protein_co HGNC (cur; KNOWN | ensembl |
| UDP glucur  | 2 UGT1A9     | protein_co HGNC (cur; KNOWN | ensembl |
| UDP glucur  | 2 UGT1A3     | protein_co HGNC (cur; KNOWN | ensembl |
| growth diff | 19 GDF15     | protein_co HGNC (aut; KNOWN | ensembl |
| Putative ur | 11 AC123789. | protein_co Clone-base KNOWN | ensembl |
|             | 4 RP11-601I1 | pseudogen Clone-base KNOWN  | havana  |
| mucin 5AC,  | 11 MUC5AC    | processed_ HGNC (cur; KNOWN | havana  |
